# Supplementary material
Source: PubMed Central journal article supplement (PMC5056110)
Supplement: pnas.1602480113.sd04.pdf [file pnas.1602480113.sd04.pdf]

**Dataset S4. Reference list for Dataset S1**

List of references associated with the impacts of invasive mammalian predators on 738 threatened or extinct bird, mammal and reptile species. Reference numbers correspond with those in *Dataset S1 data.csv*.

1. J. Kear, G. Williams, Waterfowl at risk. *Wildfowl*. **29**, 5–21 (1978).
2. P. J. Moore, K. Walker, Auckland Island Teal *Anas aucklandica aucklandica* revisited. *Wildfowl*. **42**, 137–144 (1991).
3. S. M. O'Connor, R. F. Maloney, R. J. Pierce, "Pateke (*Anas chlorotis*) recovery plan, 2005-10" (Department of Conservation, Wellington, 2007).
4. M. Alley, B. D. Gartrell, K. J. Morgan, Predation and other causes of death in pateke (brown teal), *Anas chlorotis*, necropsied during 2000 - 2005. *Kokako*. **14**, 19–24 (2007).
5. C. O'Donnell, B. K. Clapperton, J. M. Monks, Impacts of introduced mammalian predators on indigenous birds of freshwater wetlands in New Zealand. *New Zealand Journal of Ecology*. **39**, 19–33 (2015).
6. J. Rickett, "The dispersal and survivorship of pateke (*Anas chlorotis*) in relation to experimental release techniques; supplementary feeding and wing-clipping", thesis, Massey University, Auckland (2010).
7. A. J. Green, Wildfowl at risk, 1992. *Wildfowl* (1992).
8. M. H. Reynolds, T. M. Work, Mortality in the endangered Laysan Teal *Anas laysanensis*: conservation implications. *Wildfowl*. **55**, 31–48 (2005).
9. Birdlife International, "*Anas laysanensis*. The IUCN Red List of Threatened Species. Version 2014.3" (IUCN, 2013).
10. Birdlife International, "*Anas melleri*. The IUCN Red List of Threatened Species. Version 2014.3" (IUCN, 2013).
11. US Fish and Wildlife Service, "Draft revised recovery plan for Hawaiian waterbirds, second draft of second revision" (US Fish and Wildlife Service, Portland, 2005).
12. A. Engilis Jr, T. K. Pratt, Status and population trends of Hawaii's native waterbirds, 1977-1987. *Wilson Bulletin*. **105**, 143–158 (1993).
13. U S Fish and Wildlife Service, "Draft revised recovery plan for the Nene or Hawaiian Goose (*Branta sandvicensis*)" (US Fish and Wildlife Service, Portland, 2004).
14. E. H. Rave, A. Cooper, D. Hu, R. Swift, K. Misajon, Population and reproductive trends of Nene *Branta sandvicensis* in Hawaii Volcanoes National Park, 1989-1999. *Wildfowl*. **55**, 7–16 (2005).
15. H. M. Hoshide, A. J. Price, L. Katahira, A progress report on nene *Branta sandvicensis* in Hawaii Volcanoes National Park from 1974-89. *Wildfowl*. **41**, 152–155 (1990).
16. P. C. Banko, Constraints on productivity of wild Nene or Hawaiian geese *Branta sandvicensis*. *Wildfowl*. **43**, 99–106 (1992).
17. R. N. Holdaway, M. D. Jones, N. R. B. Athfield, Late Holocene extinction of Finsch's duck (*Chenonetta finschi*), an endemic, possibly flightless, New Zealand duck. *Journal of the Royal Society of New Zealand*. **32**, 629–651 (2002).
18. Birdlife International, "*Dendrocygna arborea*. The IUCN Red List of Threatened Species. Version 2014.3" (IUCN, 2013).
19. N. L. Staus, Habitat use and home range of West Indian whistling-ducks. *The Journal of Wildlife Management*. **62**, 171–178 (1998).
20. T. Holmes, D. Caskey, "Translocation of wild-caught and captive-reared blue duck *Hymenolaimus malacorhynchos*" (Department of Conservation, Wellington, 2001).
21. J. Adams, D. Cunningham, J. Molloy, S. Phillipson, "Blue duck (Whio), *Hymenolaimus malacorhynchos* recovery plan" (Department of Conservation, Wellington, 1997).
22. A. L. Whitehead, K. Edge, A. F. Smart, G. S. Hill, M. J. Willans, Large scale predator control improves the productivity of a rare New Zealand riverine duck. *Biological Conservation*. **141**, 2784–2794 (2008).
23. A. L. Whitehead, G. P. Elliott, A. R. McIntosh, Large-scale predator control increases population viability of a rare New Zealand riverine duck. *Austral Ecology*. **35**, 722–730 (2010).
24. M. Nordström *et al.*, Variable responses of waterfowl breeding populations to long-term removal of introduced American mink. *Ecography*. **25**, 385–394 (2002).
25. Birdlife International, "*Mergus australis*. The IUCN Red List of Threatened Species. Version 2014.3" (IUCN, 2012).
26. Birdlife International, "*Salvadorina waigiensis*. The IUCN Red List of Threatened Species. Version 2014.3" (IUCN, 2012).
27. Birdlife International, "*Rhyticeros narcondami*. The IUCN Red List of Threatened Species. Version 2014.3" (IUCN, 2013).

28. S. L. Olson, Paleornithology of St. Helena Island, South Atlantic Ocean. *Smithsonian Contributions to Paleobiology*. **23**, 1–49 (1975).
29. Birdlife International, “*Aegotheles savesi*. The IUCN Red List of Threatened Species. Version 2014.3” (IUCN, 2013).
30. J. M. M. Ekstrom *et al.*, New information on the distribution, status and conservation of terrestrial bird species in Grande Terre, New Caledonia. *Emu*. **102**, 197–207 (2002).
31. Birdlife International, “*Aerodramus elaphrus*. The IUCN Red List of Threatened Species. Version 2014.3” (IUCN, 2012).
32. Birdlife International, “*Aerodramus sawtelli*. The IUCN Red List of Threatened Species. Version 2014.3” (IUCN, 2012).
33. F. J. Vilella, Reproductive ecology and behaviour of the Puerto Rican Nightjar *Caprimulgus noctitherus*. *Bird Conservation International*. **5**, 349–366 (2010).
34. Birdlife International, “*Eurostopodus exul*. The IUCN Red List of Threatened Species. Version 2014.3” (IUCN, 2014).
35. Birdlife International, “*Siphonorhis americana*. The IUCN Red List of Threatened Species. Version 2014.3” (IUCN, 2012).
36. Birdlife International, “*Chlorostilbon elegans*. The IUCN Red List of Threatened Species. Version 2014.3” (IUCN, 2012).
37. I. Hahn, U. Romer, R. P. Schlatter, Population numbers and status of land birds of the Juan Fernandez Archipelago, Chile. *Senckenbergiana Biologica*. **86**, 109–152 (2006).
38. I. Hahn, U. Romer, Threatened avifauna of the Juan Fernández Archipelago, Chile: the impact of introduced mammals and conservation priorities. *Cotinga*. **17**, 66–72 (2002).
39. R. K. Colwell, Hummingbirds of the Juan Fernández Islands: natural history, evolution and population status. *Ibis*. **131**, 548–566 (1989).
40. L. R. DeWeese, D. W. Anderson, Distribution and breeding biology of Craveri's Murrelet. *Transactions of the San Diego Society of Natural History*. **18**, 155–168 (1976).
41. B. S. Keitt, Status of Xantus's murrelet and its nesting habitat in Baja California, Mexico. *Marine Ornithology*. **33**, 105–114 (2005).
42. G. J. McChesney, B. R. Tershy, History and status of introduced mammals and impacts to breeding seabirds on the California Channel and northwestern Baja California islands. *Colonial Waterbirds*. **21**, 335–347 (1998).
43. D. L. Whitworth, H. R. Carter, F. Gress, Recovery of a threatened seabird after eradication of an introduced predator: Eight years of progress for Scripps's murrelet at Anacapa Island, California. *Biological Conservation*. **162**, 52–59 (2013).
44. D. L. Whitworth *et al.*, Initial recovery of Xantus's Murrelets following rat eradication on Anacapa Island, California. *Marine Ornithology*. **33**, 131–137 (2005).
45. H. P. Jones, R. Williamhenry, G. R. Howald, B. R. Tershy, D. A. Croll, Predation of artificial Xantus's murrelet (*Synthliboramphus hypoleucus scrippsi*) nests before and after black rat (*Rattus rattus*) eradication. *Environmental Conservation*. **32**, 320–325 (2006).
46. Birdlife International, “*Synthliboramphus scrippsi*. The IUCN Red List of Threatened Species. Version 2014.3” (IUCN, 2014).
47. Birdlife International, “*Synthliboramphus wumizusume*. The IUCN Red List of Threatened Species. Version 2014.3” (IUCN, 2012).
48. H. R. Carter *et al.*, Status and conservation of the Japanese murrelet (*Synthliboramphus wumizusume*) in the Izu Islands, Japan. *Journal of the Yamashina Institute for Ornithology*. **33**, 61–87 (2002).
49. J. E. Dowding, E. C. Murphy, The impact of predation by introduced mammals on endemic shorebirds in New Zealand: a conservation perspective. *Biological Conservation*. **99**, 47–64 (2001).
50. P. F. Battley, S. J. Moore, Predation on non-breeding wrybills in the Firth of Thames. *Notornis*. **51**, 233–234 (2004).
51. Birdlife International, “*Alopecoenas kubaryi*. The IUCN Red List of Threatened Species. Version 2014.3” (IUCN, 2012).
52. J. E. Dowding, Past distribution and decline of the New Zealand dotterel (*Charadrius obscurus*) in the South Island of New Zealand. *Notornis*. **46**, 167–180 (1999).
53. J. E. Dowding, A. M. Davis, “New Zealand dotterel (*Charadrius obscurus*) recovery plan, 2004–14” (Department of Conservation, Wellington, 2007).
54. D. E. Wills, J. Murray, R. G. Powlesland, Impact of management on the breeding success of the northern New Zealand dotterel (*Charadrius obscurus aquilonius*) on Matakana Island, Bay of Plenty. *Notornis*. **50**, 1–10 (2003).

55. J. E. Dowding, E. C. Murphy, Decline of the Stewart Island population of the New Zealand Dotterel. *Notornis*. **40**, 1–13 (1993).
56. J. E. Dowding, E. C. Murphy, Predation of northern New Zealand Dotterels (*Charadrius obscurus aquilonius*) by stoats. *Notornis*. **43**, 144–146 (1996).
57. N. McCulloch, Status, habitat and conservation of the St Helena Wirebird *Charadrius sanctaehelenae*. *Bird Conservation International*. **1**, 361–392 (2010).
58. F. Burns, N. McCulloch, T. Szekely, M. Bolton, The impact of introduced predators on an island endemic, the St Helena Plover, *Charadrius sanctaehelenae*. **23**, 125–135 (2013).
59. S. Oppel *et al.*, Habitat-specific effectiveness of feral cat control for the conservation of an endemic ground-nesting bird species. *Journal of Applied Ecology*. **51**, 1246–1254 (2014).
60. M. A. Weston, “Managing the hooded plover in Victoria: a review of existing information” (Parks Victoria, Melbourne, 2003).
61. G. S. Maguire, D. Stojanovic, M. A. Weston, Conditioned taste aversion reduces fox depredation on model eggs on beaches. *Wildlife Research*. **36**, 702–708 (2009).
62. B. Baird, P. Dann, The breeding biology of Hooded Plovers, *Thinornis rubricollis*, on Phillip Island, Victoria. *Emu*. **103**, 323–328 (2003).
63. S. Garnett, J. Szabo, G. Dutton, *Action Plan for Australian Birds 2010* (CSIRO Publishing, Melbourne, 2011).
64. P. J. Moore, “Chatham Island oystercatcher (*Haematopus chathamensis*) management techniques: guidelines for protecting nests and increasing their productivity” (Department of Conservation, Wellington, 2009).
65. P. J. Moore, C. Reid, Effectiveness of management on the breeding success of Chatham Island oystercatchers (*Haematopus chathamensis*). *New Zealand Journal of Zoology*. **36**, 431–446 (2009).
66. P. J. Moore, The recovering population of the Chatham Island oystercatcher (*Haematopus chathamensis*). *Notornis*. **55**, 20–31 (2008).
67. Birdlife International, “*Haematopus meadewaldoi*. The IUCN Red List of Threatened Species. Version 2014.3” (IUCN, 2012).
68. R. J. Keedwell, M. D. Sanders, M. Alley, C. Twentyman, Causes of mortality of black-fronted terns *Sterna albobriata* on the Ohau River, South Island, New Zealand. *Pacific Conservation Biology*. **8**, 170–176 (2002).
69. K. E. Steffens, M. D. Sanders, D. M. Gleeson, K. M. Pullen, C. J. Stowe, Identification of predators at black-fronted tern *Chlidonias albobriatus* nests, using mtDNA analysis and digital video recorders. *New Zealand Journal of Ecology*. **36**, 48–55 (2012).
70. C. F. O’Donnell, J. M. Hoare, Meta-analysis of status and trends in breeding populations of black-fronted terns (*Chlidonias albobriatus*) 1962–2008. *New Zealand Journal of Ecology*. **35**, 30–43 (2011).
71. J. M. Monks, C. F. O’Donnell, E. B. Spurr, Population trends in black-fronted terns (*Chlidonias albobriatus*) on the Ashley River, North Canterbury. *Notornis*. **60**, 171–172 (2013).
72. C. F. O’Donnell, J. A. Sedgeley, J. Van Hal, Variation in house cat (*Felis catus*) predation sign at a black-fronted tern (*Sterna albobriata*) colony. *Notornis*. **57**, 43–47 (2010).
73. M. D. Sanders, R. F. Maloney, Causes of mortality at nests of ground-nesting birds in the Upper Waitaki Basin, South Island, New Zealand: a 5-year video study. *Biological Conservation*. **106**, 225–236 (2002).
74. G. A. Taylor, “Action plan for seabird conservation in New Zealand” (Department of Conservation, Wellington, 2000).
75. Birdlife International, “*Pterodroma longirostris*. The IUCN Red List of Threatened Species. Version 2014.3” (IUCN, 2012).
76. R. K. McClellan, A. Habraken, in *New Zealand Birds Online* (2013; <http://nzbirdsonline.org.nz/species/black-billed-gull>).
77. Birdlife International, “*Larus fuliginosus*. The IUCN Red List of Threatened Species. Version 2014.3” (IUCN, 2012).
78. D. A. Wiedenfeld, G. Jiménez-Uzcátegui, Critical problems for bird conservation in the Galápagos Islands. *Cotinga*. **29**, 22–27 (2008).
79. Birdlife International, “*Rynchops albigollis*. The IUCN Red List of Threatened Species. Version 2014.3” (IUCN, 2013).
80. Birdlife International, “*Sterna acuticauda*. The IUCN Red List of Threatened Species. Version 2014.3” (IUCN, 2012).
81. K. Hansen, “New Zealand fairy tern (*Sterna nereis davisae*) recovery plan, 2005–15” (Department of Conservation, Wellington, 2006).

82. T. Wilson, K. Hansen, Predator control to enhance breeding success of the New Zealand fairy tern *Sterna nereis davisae*, North Island, New Zealand. *Conservation Evidence*. **2**, 89 (2005).
83. S. M. Ferreira *et al.*, Conservation of the endangered New Zealand fairy tern. *Biological Conservation*. **125**, 345–354 (2005).
84. Birdlife International, “*Thalasseus bernsteini*. The IUCN Red List of Threatened Species. Version 2014.3” (IUCN, 2013).
85. D. Baker-Gabb, Native grasslands and the Plains-wanderer. *Wingspan*. **8**, supp1–8 (1998).
86. R. J. Pierce, Differences in susceptibility to predation during nesting between pied and black stilts (*Himantopus* spp.). *The Auk*. **103**, 273–280 (1986).
87. J. Cruz *et al.*, Species-specific responses by ground-nesting Charadriiformes to invasive predators and river flows in the braided Tasman River of New Zealand. *Biological Conservation*. **167**, 363–370 (2013).
88. R. J. Keedwell, R. F. Maloney, D. P. Murray, Predator control for protecting kaki (*Himantopus novaezelandiae*)— lessons from 20 years of management. *Biological Conservation*. **105**, 369–374 (2002).
89. Birdlife International, “*Himantopus novaezelandiae*. The IUCN Red List of Threatened Species 2013: e.T22693690A49825281” (IUCN, 2013).
90. Birdlife International, “*Coenocorypha barrierensis*. The IUCN Red List of Threatened Species. Version 2015.1” (IUCN, 2014).
91. Birdlife International, “*Coenocorypha iredalei*. The IUCN Red List of Threatened Species. Version 2015.1” (IUCN, 2014).
92. C. M. Miskelly, Discovery and extinction of the South Island Snipe (*Coenocorypha iredalei*) on islands around Stewart Island. *Notornis*. **59**, 15–31 (2012).
93. Birdlife International, “*Pareudiastes silvestris*. The IUCN Red List of Threatened Species. Version 2014.3” (IUCN, 2013).
94. Birdlife International, “*Numenius tahitiensis*. The IUCN Red List of Threatened Species. Version 2014.3” (IUCN, 2012).
95. J. S. Marks, R. L. Redmond, Conservation problems and research needs for Bristle-thighed Curlews *Numenius tahitiensis* on their wintering grounds. *Bird Conservation International*. **4**, 329–341 (2010).
96. Birdlife International, “*Prosobonia cancellata*. The IUCN Red List of Threatened Species. Version 2014.3” (IUCN, 2014).
97. R. J. Pierce, C. Blanvillain, Current status of the endangered Tuamotu Sandpiper or Titi *Prosobonia cancellata* and recommended actions for its recovery. *Wader Study Group Bulletin*. **105**, 93–100 (2004).
98. Birdlife International, “*Prosobonia ellisi*. The IUCN Red List of Threatened Species. Version 2014.3” (IUCN, 2012).
99. Birdlife International, “*Prosobonia leucoptera*. The IUCN Red List of Threatened Species. Version 2014.3” (IUCN, 2012).
100. Birdlife International, “*Prosobonia parvirostris*. The IUCN Red List of Threatened Species. Version 2014.3” (IUCN, 2014).
101. Birdlife International, “*Scolopax mira*. The IUCN Red List of Threatened Species. Version 2014.3” (IUCN, 2012).
102. Birdlife International, “*Turnix novaecaledoniae*. The IUCN Red List of Threatened Species. Version 2014.3” (IUCN, 2014).
103. S. Madge, P. McGowan, *Pheasants, Partridges, and Grouse: A Guide to the Pheasants, Partridges, Quails, Grouse, Guineafowl, Buttonquails, and Sandgrouse of the World* (Christopher Helm, London, 2002).
104. Birdlife International, “*Alectroenas payandeei*. The IUCN Red List of Threatened Species. Version 2014.3” (IUCN, 2014).
105. Birdlife International, “*Alopecoenas erythropterus*. The IUCN Red List of Threatened Species. Version 2014.3” (IUCN, 2013).
106. C. Blanvillain, C. Florent, V. Thenot, Land birds of Tuamotu Archipelago, Polynesia: relative abundance and changes during the 20th century with particular reference to the critically endangered Polynesian ground-dove (*Gallicolumba erythroptera*). *Biological Conservation*. **103**, 139–149 (2002).
107. C. Monnet, L. Sandford, P. Siu, J. C. Thibault, Polynesian Ground Dove (*Gallicolumba erythroptera*) discovered at Rangiroa Atoll, Tuamotu islands (Polynesia). *Notornis*. **40**, 128–130 (1993).
108. Birdlife International, “*Alopecoenas ferrugineus*. The IUCN Red List of Threatened Species. Version 2014.3” (IUCN, 2012).
109. D. W. Buden, A comparison of 1983 and 1994 bird surveys of Pohnpei, federated states of Micronesia. *Wilson Bulletin*. **112**, 403–410 (2000).
110. Birdlife International, “*Alopecoenas rubescens*. The IUCN Red List of Threatened Species. Version 2014.3” (IUCN, 2012).
111. Birdlife International, “*Alopecoenas salamonis*. The IUCN Red List of Threatened Species. Version 2014.3” (IUCN, 2012).
112. Birdlife International, “*Alopecoenas sanctaecrucis*. The IUCN Red List of Threatened Species. Version 2014.3” (IUCN, 2013).

113. Birdlife International, "*Alopecoenas stairi*. The IUCN Red List of Threatened Species. Version 2014.3" (IUCN, 2012).
114. Birdlife International, "*Caloenas maculata*. The IUCN Red List of Threatened Species. Version 2014.3" (IUCN, 2014).
115. Birdlife International, "*Columba pallidiceps*. The IUCN Red List of Threatened Species. Version 2014.3" (IUCN, 2012).
116. Birdlife International, "*Columba thiriouxi*. The IUCN Red List of Threatened Species. Version 2014.3" (IUCN, 2014).
117. Birdlife International, "*Columba versicolor*. The IUCN Red List of Threatened Species. Version 2014.3" (IUCN, 2012).
118. Birdlife International, "*Didunculus strigirostris*. The IUCN Red List of Threatened Species. Version 2014.3" (IUCN, 2014).
119. MNRE, "*Recovery plan for the Manumea or Tooth-billed Pigeon Didunculus strigirostris*" (Ministry of Natural Resources & Environment (MNRE), Government of Samoa, Apia, 2006).
120. N. J. Collar, Natural history and conservation biology of the tooth-billed pigeon (*Didunculus strigirostris*): a review. *Pacific Conservation Biology*. **21**, 186–199 (2015).
121. J. C. Thibault, I. Guyot, Recent changes in the avifauna of Makatea Island (Tuamotus, Central Pacific). *Atoll Research Bulletin*. **300**, 1–13 (1987).
122. Birdlife International, "*Ducula aurorae*. The IUCN Red List of Threatened Species. Version 2014.3" (IUCN).
123. M. Thorsen, C. Blanvillain, R. Sulpice, *Reasons for decline, conservation needs, and a translocation of the critically endangered upe (Marquesas imperial pigeon, Ducula galeata), French Polynesia. DOC Science Internal Series 88* (Department of Conservation, Wellington, 2002).
124. Birdlife International, "*Ducula pickeringii*. The IUCN Red List of Threatened Species. Version 2014.3" (IUCN, 2012).
125. Birdlife International, "*Gallucolumba keayi*. The IUCN Red List of Threatened Species. Version 2014.3" (IUCN, 2013).
126. Birdlife International, "*Geotrygon caniceps*. The IUCN Red List of Threatened Species. Version 2014.3" (IUCN, 2014).
127. Birdlife International, "*Geotrygon leucometopia*. The IUCN Red List of Threatened Species. Version 2014.3" (IUCN, 2014).
128. A. D. Grant, R. G. Powlesland, P. J. Dilks, I. A. Flux, C. J. Tisdall, Mortality, distribution, numbers and conservation of the Chatham Island Pigeon (*Hemiphaga novaeseelandiae chathamensis*). *Notornis*. **44**, 65–77 (1997).
129. I. A. Flux, R. G. Powlesland, P. J. Dilks, A. D. Grant, Breeding, survival, and recruitment of Chatham Island pigeon (*Hemiphaga chathamensis*). *Notornis*. **48**, 177–206 (2001).
130. P. J. Dilks, R. G. Powlesland, L. K. Adams, I. A. Flux, Changes in abundance of parea (Chatham Islands pigeon, *Hemiphaga chathamensis*), 1994–2009. *Notornis*. **57**, 156–161 (2010).
131. Birdlife International, "*Hemiphaga chathamensis*. The IUCN Red List of Threatened Species. Version 2015.1" (IUCN, 2014).
132. Birdlife International, "*Henicophaps foersteri*. The IUCN Red List of Threatened Species. Version 2014.3" (IUCN, 2012).
133. Birdlife International, "*Leptotila wellsii*. The IUCN Red List of Threatened Species. Version 2014.3" (IUCN, 2013).
134. Birdlife International, "*Microgoura meeki*. The IUCN Red List of Threatened Species. Version 2014.3" (IUCN, 2012).
135. W. J. Tennet, A cat among the pigeons! Known specimens and supposed distribution of the extinct Solomons Crested Pigeon *Microgoura meeki* Rothschild, 1904. *Bulletin of the British Ornithologists' Club*. **129**, 241–253 (2009).
136. Birdlife International, "*Nesoenas cicur*. The IUCN Red List of Threatened Species. Version 2014.3" (IUCN, 2014).
137. Birdlife International, "*Nesoenas duboisi*. The IUCN Red List of Threatened Species. Version 2014.3" (IUCN, 2012).
138. S. P. Carter, P. W. Bright, in *Turning the tide: the eradication of invasive species*, C. R. Veitch, M. N. Clout, Eds. (IUCN, Gland Switzerland and Cambridge UK, 2002), pp. 71–78.
139. Birdlife International, "*Nesoenas mayeri*. The IUCN Red List of Threatened Species. Version 2014.3" (IUCN, 2013).
140. N. J. Collar, M. J. Crosby, A. J. Stattersfield, *Birds to watch 2: the world list of threatened birds* (BirdLife International, Cambridge, 1994).
141. Birdlife International, "*Nesoenas rodericanus*. The IUCN Red List of Threatened Species. Version 2014.3" (IUCN, 2014).
142. Birdlife International, "*Pezophaps solitaria*. The IUCN Red List of Threatened Species. Version 2014.3" (IUCN, 2012).
143. A. S. Cheke, in *Studies of Mascarene Island birds*, A. W. Diamond, Ed. (Cambridge, 1987), pp. 5–89.
144. Birdlife International, "*Ptilinopus chalcurus*. The IUCN Red List of Threatened Species. Version 2014.3" (IUCN, 2012).
145. J.-C. Thibault, A. Varney, Numbers and habitat of the Rapa Fruit-dove *Ptilinopus huttoni*. *Bird Conservation International*. **1**, 75–81 (1991).

146. Birdlife International, "*Ptilinopus mercierii*. The IUCN Red List of Threatened Species. Version 2014.3" (IUCN, 2012).
147. Birdlife International, "*Treron griveaudi*. The IUCN Red List of Threatened Species. Version 2014.3" (IUCN, 2014).
148. Birdlife International, "*Zenaida graysoni*. The IUCN Red List of Threatened Species. Version 2014.3" (IUCN, 2012).
149. Birdlife International, "*Actenoides excelsus*. The IUCN Red List of Threatened Species. Version 2014.3" (IUCN, 2014).
150. Birdlife International, "*Todiramphus cinnamominus*. The IUCN Red List of Threatened Species. Version 2014.3" (IUCN, 2014).
151. D. C. Kesler, R. J. Laws, A. S. Cox, A. Gouni, J. D. Stafford, Survival and population persistence in the critically endangered Tuamotu kingfisher. *The Journal of Wildlife Management*. **76**, 1001–1010 (2012).
152. A. Withers, T. Ghestemme, T. Autai, "Meet the last population of Marquesan kingfisher in French Polynesia. Unpublished report." (Conservation Leadership Program, SOP, Waikato University, Hamilton, 2012).
153. S. Rowe, R. Empson, Distribution and abundance of the Tanga'eo or Mangaia Kingfisher (*Halcyon tuta ruficollaris*). *Notornis*. **43**, 35–42 (1996).
154. Birdlife International, "*Geobiastes squamiger*. The IUCN Red List of Threatened Species. Version 2014.3" (IUCN, 2012).
155. Birdlife International, "*Uratelornis chimaera*. The IUCN Red List of Threatened Species. Version 2014.3" (IUCN, 2012).
156. Birdlife International, "*Coccyzus ferrugineus*. The IUCN Red List of Threatened Species. Version 2014.3" (IUCN, 2012).
157. Birdlife International, "*Coua delalandei*. The IUCN Red List of Threatened Species. Version 2014.3" (IUCN, 2012).
158. G. R. Hunt, "Ecology and conservation of the kagu *Rhynochetos jubatus* of New Caledonia", thesis, Massey University, Palmerston North (1997).
159. G. R. Hunt, R. Hay, C. J. Veltman, Multiple Kagu *Rhynochetos jubatus* deaths caused by dog attacks at a high-altitude study site on Pic Ningua, New Caledonia. *Bird Conservation International*. **6**, 295–306 (2010).
160. B. S. Keitt *et al.*, "El impacto de los gatos introducidos (*Felis catus*) en el ecosistema de Isla Guadalupe" (2006), (available at <http://www2.inecc.gob.mx/publicaciones/libros/477/cap14.html>).
161. Birdlife International, "*Falco duboisi*. The IUCN Red List of Threatened Species. Version 2014.3" (IUCN, 2012).
162. C. G. Jones *et al.*, The restoration of the Mauritius kestrel *Falco punctatus* population. *Ibis*. **137**, S173–S180 (1995).
163. T. J. Cade, C. G. Jones, Progress in restoration of the Mauritius kestrel. *Conservation Biology*. **7**, 169–175 (1993).
164. I. Mauro, Habitat, microdistribution and conservation status of the enigmatic Bruijn's Brush-turkey *Aepyodius bruijnii*. *Bird Conservation International*. **16**, 279–15 (2006).
165. I. Mauro, "The field discovery, ecology, monitoring and conservation of an enigma: Bruijn's Brush-turkey *Aepyodius bruijnii* Oustalet 1880. Final report to the Van Tienhoven Foundation for International Nature Protection and WPA/Birdlife/SSC Megapode Specialist Group" (Leiden, 2004).
166. C. J. Heij, C. Rompas, C. W. Moeliker, The biology of the Moluccan megapode *Eulipoa wallacei* (Aves, Galliformes, Megapodiidae) on Haruku and other Moluccan islands; part 2: final report. *Deinsea*. **3**, 1–123 (1997).
167. C. J. Heij, Feral cat as a nightly predator of egg-laying Moluccan megapodes *Eulipoa wallacei*. *Deinsea*. **8**, 251–252 (2001).
168. C. J. Heij, The biology of the Moluccan megapode *Eulipoa wallacei* (Aves, Galliformes, Megapodiidae) on Haruku and other Moluccan Islands; part 3: update of data until 2001. *Deinsea*. **8**, 229–241 (2001).
169. J. Benshemesh, "National recovery plan for malleefowl *Leipoa ocellata*" (Department of Environment and Heritage, South Australia, 2007).
170. D. Priddel, R. Wheeler, Mortality of captive-raised malleefowl, *Leipoa ocellata*, released into a mallee remnant within the wheat-belt of New South Wales. *Wildlife Research*. **21**, 543–551 (1994).
171. D. Priddel, R. Wheeler, Effect of age at release on the susceptibility of captive-reared malleefowl *Leipoa ocellata* to predation by the introduced red fox *Vulpes vulpes*. *Emu*. **96**, 32–41 (1996).
172. D. Priddel, R. Wheeler, Efficacy of fox control in reducing the mortality of released captive-reared malleefowl, *Leipoa ocellata*. *Wildlife Research*. **24**, 469–482 (1997).
173. Birdlife International, "*Megapodius bernsteinii*. The IUCN Red List of Threatened Species. Version 2014.3" (IUCN, 2012).
174. Birdlife International, "*Megapodius geelvinkianus*. The IUCN Red List of Threatened Species. Version 2014.3" (IUCN, 2012).
175. US Fish and Wildlife Service, "Recovery plan for the Micronesian megapode (*Megapodius laperouse laperouse*)" (US Fish and Wildlife Service, Portland, 1998).

176. K. Sivakumar, Impact of the 2004 tsunami on the vulnerable Nicobar megapode *Megapodius nicobariensis*. *Oryx*. **44**, 71–78 (2009).
177. Birdlife International, “*Megapodius nicobariensis*. The IUCN Red List of Threatened Species. Version 2014.3” (IUCN, 2012).
178. A. Goth, U. Vogel, Status of the Polynesian Megapode *Megapodius pritchardii* on Niuago'ou (Tonga). *Bird Conservation International*. **5**, 117–128 (1995).
179. Birdlife International, “*Cyrtonyx ocellatus*. The IUCN Red List of Threatened Species. Version 2014.3” (IUCN, 2013).
180. Birdlife International, “*Acrocephalus rehsei*. The IUCN Red List of Threatened Species. Version 2014.3” (IUCN, 2012).
181. Birdlife International, “*Anthropoides paradiseus*. The IUCN Red List of Threatened Species. Version 2014.3” (IUCN, 2013).
182. Birdlife International, “*Acrocephalus caffer*. The IUCN Red List of Threatened Species. Version 2014.3” (IUCN, 2012).
183. J. Riley, Population sizes and the conservation status of endemic and restricted-range bird species on Karakelang, Talaud Islands, Indonesia. *Bird Conservation International*. **13**, 59–74 (2003).
184. Birdlife International, “*Aphanapteryx bonasia*. The IUCN Red List of Threatened Species. Version 2014.3” (20, 2012).
185. Birdlife International, “*Aramidopsis plateni*. The IUCN Red List of Threatened Species. Version 2014.3” (IUCN, 2012).
186. Birdlife International, “*Atlantisia podarces*. The IUCN Red List of Threatened Species. Version 2014.3” (IUCN, 2012).
187. Birdlife International, “*Cabalus modestus*. The IUCN Red List of Threatened Species. Version 2015.1” (IUCN, 2012).
188. Birdlife International, “*Cyanolimnas cerverai*. The IUCN Red List of Threatened Species. Version 2014.3” (IUCN, 2013).
189. Birdlife International, “*Dryolimnas augusti*. The IUCN Red List of Threatened Species. Version 2014.3” (IUCN, 2012).
190. Birdlife International, “*Gallinula comeri*. The IUCN Red List of Threatened Species. Version 2014.3” (IUCN, 2014).
191. Birdlife International, “*Gallinula nesiotis*. The IUCN Red List of Threatened Species. Version 2014.3” (IUCN, 2014).
192. A. J. Beauchamp, D. J. Butler, D. King, “Weka (*Gallirallus australis*) recovery plan” (Department of Conservation, Wellington, 1999).
193. G. N. Bramley, A small predator removal experiment to protect North Island weka (*Gallirallus australis greyi*) and the case for single-subject approaches in determining agents of decline. *New Zealand Journal of Ecology*. **20**, 37–43 (1996).
194. A. J. Beauchamp, B. Van Berkum, M. J. Closs, The decline of North Island Weka (*Gallirallus australis greyi*) at Parekura Bay, Bay of Islands. *Notornis*. **45**, 31–43 (1998).
195. G. N. Bramley, C. J. Veltman, Failure of translocated, captive-bred North Island weka *Gallirallus australis greyi* to establish a new population. *Bird Conservation International*. **8**, 195–204 (2010).
196. Birdlife International, “*Gallirallus lafresnayanus*. The IUCN Red List of Threatened Species. Version 2014.3” (IUCN, 2013).
197. Birdlife International, “*Habroptila wallacii*. The IUCN Red List of Threatened Species. Version 2014.3” (IUCN, 2012).
198. Birdlife International, “*Hypotaenidia dieffenbachii*. The IUCN Red List of Threatened Species. Version 2015.2” (IUCN, 2012).
199. Birdlife International, “*Hypotaenidia okinawae*. The IUCN Red List of Threatened Species. Version 2014.3” (IUCN, 2013).
200. K. Ozaki *et al.*, The declining distribution of the Okinawa rail *Gallirallus okinawae*. *Journal of the Yamashina Institute for Ornithology*. **34**, 136–144 (2002).
201. Birdlife International, “*Hypotaenidia owstoni*. The IUCN Red List of Threatened Species. Version 2014.3” (IUCN, 2012).
202. G. J. Witteman, R. E. Beck, S. L. Pimm, S. R. Derrickson, The decline and restoration of the Guam rail, *Rallus owstoni*. *Endangered Species Update*. **7**, 36–39 (1990).
203. Birdlife International, “*Hypotaenidia pacifica*. The IUCN Red List of Threatened Species. Version 2014.3” (IUCN, 2012).
204. Birdlife International, “*Hypotaenidia poeciloptera*. The IUCN Red List of Threatened Species. Version 2014.3” (IUCN, 2012).
205. B. Miller, K. J. Mullette, Rehabilitation of an endangered Australian bird: The Lord Howe Island woodhen *Tricholimnas sylvestris* (Sclater). *Biological Conservation*. **34**, 55–95 (1985).
206. Birdlife International, “*Laterallus spilonota*. The IUCN Red List of Threatened Species. Version 2014.3” (IUCN, 2014).
207. C. J. Donlan *et al.*, Recovery of the Galápagos rail (*Laterallus spilonotus*) following the removal of invasive mammals. *Biological Conservation*. **138**, 520–524 (2007).
208. Birdlife International, “*Mundia elpenor*. The IUCN Red List of Threatened Species. Version 2014.3” (IUCN, 2012).

209. Birdlife International, "*Pareudiastes pacificus*. The IUCN Red List of Threatened Species. Version 2014.3" (IUCN, 2013).
210. D. Hegg, "Evaluating the effectiveness of the Murchison Mountain stoat trapping programme" (University of Otago, Dunedin, 2006).
211. C. Wickes, D. Crouchley, J. Maxwell, "Takahe (*Porphyrio hochstetteri*) recovery plan: 2007-2012" (Department of Conservation, Wellington, 2009).
212. D. Hegg, G. Greaves, J. M. Maxwell, D. I. MacKenzie, I. G. Jamieson, Demography of takahe (*Porphyrio hochstetteri*) in Fiordland: environmental factors and management affect survival and breeding success. *New Zealand Journal of Ecology*. **36**, 75–89 (2012).
213. D. Hegg, D. I. MacKenzie, I. G. Jamieson, Use of Bayesian population viability analysis to assess multiple management decisions in the recovery programme for the endangered takahe *Porphyrio hochstetteri*. *Oryx*. **47**, 144–152 (2013).
214. Birdlife International, "*Porphyrio kukwiedei*. The IUCN Red List of Threatened Species. Version 2014.3" (IUCN, 2012).
215. Birdlife International, "*Porphyrio paepae*. The IUCN Red List of Threatened Species. Version 2014.3" (IUCN, 2014).
216. Birdlife International, "*Rallus semiplumbeus*. The IUCN Red List of Threatened Species. Version 2014.3" (IUCN, 2012).
217. Birdlife International, "*Tribonyx hodgenorum*. The IUCN Red List of Threatened Species. Version 2015.2" (IUCN, 2014).
218. Birdlife International, "*Zapornia astrictocarpus*. The IUCN Red List of Threatened Species. Version 2014.3" (IUCN, 2012).
219. Birdlife International, "*Zapornia monasa*. The IUCN Red List of Threatened Species. Version 2014.3" (IUCN, 2012).
220. Birdlife International, "*Zapornia nigra*. The IUCN Red List of Threatened Species. Version 2014.3" (IUCN, 2012).
221. Birdlife International, "*Zapornia palmeri*. The IUCN Red List of Threatened Species. Version 2014.3" (2012, 2012).
222. Birdlife International, "*Zapornia sandwichensis*. The IUCN Red List of Threatened Species. Version 2014.3" (IUCN, 2012).
223. Birdlife International, "*Mesitornis unicolor*. The IUCN Red List of Threatened Species. Version 2014.3" (IUCN, 2012).
224. Birdlife International, "*Monias benschi*. The IUCN Red List of Threatened Species. Version 2014.3" (IUCN, 2012).
225. Birdlife International, "*Chlamydotis undulata*. The IUCN Red List of Threatened Species. Version 2014.3" (IUCN, 2014).
226. R. Galbreath, D. Brown, The tale of the lighthouse-keeper's cat: Discovery and extinction of the Stephens Island wren (*Traversia lyalli*). *Notornis*. **51**, 193–200 (2004).
227. S. Michelsen-Heath, P. Gaze, Changes in abundance and distribution of the rock wren (*Xenicus gilbiventris*) in the South Island, New Zealand. *Notornis*. **54**, 71–78 (2008).
228. Birdlife International, "*Zosterops samoensis*. The IUCN Red List of Threatened Species. Version 2014.3" (IUCN, 2012).
229. Birdlife International, "*Xenicus longipes*. The IUCN Red List of Threatened Species. Version 2015.2" (IUCN, 2012).
230. M. N. Clout, Biodiversity loss caused by invasive alien vertebrates. *Zeitschrift für Jagdwissenschaft*. **48**, 51–58 (2002).
231. C. F. J. O'Donnell, P. J. Dilks, G. P. Elliott, Control of a stoat (*Mustela erminea*) population irruption to enhance mohua (yellowhead) (*Mohoua ochrocephala*) breeding success in New Zealand. *New Zealand Journal of Zoology*. **23**, 279–286 (1996).
232. C. F. J. O'Donnell, S. M. Phillipson, Predicting the incidence of mohua predation from the seedfall, mouse, and predator fluctuations in beech forests. *New Zealand Journal of Zoology*. **23**, 287–293 (1996).
233. P. Dilks, Recovery of a Mohua (*Mohoua ochrocephala*) population following predator control in the Eglinton Valley, Fiordland, New Zealand. *Notornis*. **46**, 323–332 (1999).
234. C. O'Donnell, Quantifying the benefits of long-term integrated pest control for forest bird populations in a New Zealand temperate rainforest. *New Zealand Journal of Ecology*. **36**, 131–140 (2012).
235. D. H. Maphisa, P. F. Donald, G. M. Buchanan, P. G. Ryan, Habitat use, distribution and breeding ecology of the globally threatened Rudd's Lark and Botha's Lark in eastern South Africa. *Ostrich*. **80**, 19–28 (2009).
236. Birdlife International, "*Spizocorys fringillaris*. The IUCN Red List of Threatened Species. Version 2014.3" (IUCN, 2012).
237. Department of Parks and Wildlife, "South coast threatened birds recovery plan" (Department of Parks and Wildlife, Perth, 2014).
238. I. Flux, P. Bradfield, Breeding biology of North Island kokako (*Callaeas cinerea wilsoni*) at Mapara Wildlife Management Reserve, King Country, New Zealand. *Notornis*. **53**, 199–207 (2006).
239. J. Innes, I. Flux, "North Island kokako recovery plan 1999 - 2009" (Department of Conservation, Wellington, 1999).



240. J. Innes *et al.*, Successful recovery of North Island kokako *Callaeas cinerea wilsoni* populations, by adaptive management. *Biological Conservation*. **87**, 201–214 (1999).
241. B. Basse, I. Flux, J. Innes, Recovery and maintenance of North Island kokako (*Callaeas cinerea wilsoni*) populations through pulsed pest control. *Biological Conservation*. **109**, 259–270 (2003).
242. Birdlife International, “*Coracina newtoni*. The IUCN Red List of Threatened Species. Version 2014.3” (IUCN, 2013).
243. J. M. Thiollay, J. M. Probst, Ecology and conservation of a small insular bird population, the Reunion cuckoo-shrike *Coracina newtoni*. *Biological Conservation*. **87**, 191–200 (1999).
244. Birdlife International, “*Coracina typica*. The IUCN Red List of Threatened Species. Version 2014.3” (IUCN, 2012).
245. Birdlife International, “*Aphelocoma coerulescens*. The IUCN Red List of Threatened Species. Version 2014.3” (IUCN, 2012).
246. Birdlife International, “*Corvus hawaiiensis*. The IUCN Red List of Threatened Species. Version 2014.3” (IUCN, 2013).
247. US Fish and Wildlife Service, “Revised Recovery Plan for the `Alala (*Corvus hawaiiensis*)” (US Fish and Wildlife Service, 2009).
248. Birdlife International, “*Corvus kubaryi*. The IUCN Red List of Threatened Species. Version 2014.3” (IUCN, 2013).
249. L. Zarones *et al.*, Population status and nest success of the critically endangered Mariana crow *Corvus kubaryi* on Rota, Northern Mariana Islands. *Bird Conservation International*. **25**, 220–233 (2015).
250. Birdlife International, “*Garrulus lidthi*. The IUCN Red List of Threatened Species. Version 2014.3” (IUCN, 2012).
251. Office of Environment & Heritage, “National recovery plan for eastern bristlebird *Dasyornis brachypterus*” (Department of Premier and Cabinet (NSW), Sydney, 2012).
252. D. B. Lindenmayer *et al.*, What factors influence rapid post-fire site re-occupancy? A case study of the endangered eastern bristlebird in eastern Australia. *International Journal of Wildland Fire*. **18**, 84–95 (2009).
253. A. H. Burbidge, S. Comer, A. Danks, A. Berryman, N. Hamilton, in *Global Re-Introduction Perspectives: Additional Case-studies from Around the Globe*, P. S. Soorae, Ed. (IUCN/SSC Re-Introduction Specialist Group, Abu Dhabi, 2010), pp. 171–175.
254. Birdlife International, “*Dicrurus fuscipennis*. The IUCN Red List of Threatened Species. Version 2014.3” (IUCN, 2012).
255. R. J. Safford, in *Important bird areas in Africa and associated islands* (Newbury and Cambridge, UK, 2001), pp. 185–190.
256. B. Fessl *et al.*, How to save the rarest Darwin's finch from extinction: the mangrove finch on Isabela Island. *Philosophical Transactions of the Royal Society B: Biological Sciences*. **365**, 1019–1030 (2010).
257. Birdlife International, “*Camarhynchus pauper*. The IUCN Red List of Threatened Species. Version 2014.3” (IUCN, 2013).
258. J. A. O'Connor, F. J. Sulloway, J. Robertson, S. Kleindorfer, *Philornis downsi* parasitism is the primary cause of nestling mortality in the critically endangered Darwin's medium tree finch (*Camarhynchus pauper*). *Biodiversity and Conservation*. **19**, 853–866 (2009).
259. P. Grant, B. Grant, K. Petren, L. Keller, Extinction behind our backs: the possible fate of one of the Darwin's finch species on Isla Floreana, Galapagos. *Biological Conservation*. **122**, 499–503 (2005).
260. Birdlife International, “*Emberiza socotrana*. The IUCN Red List of Threatened Species. Version 2014.3” (IUCN, 2012).
261. K. V. Damme, L. Banfield, Past and present human impacts on the biodiversity of Socotra Island (Yemen): implications for future conservation. *Zoology in the Middle East*. **54**, 31–88 (2011).
262. Birdlife International, “*Melanospiza richardsoni*. The IUCN Red List of Threatened Species. Version 2014.3” (IUCN, 2012).
263. Birdlife International, “*Pinaroloxias inornata*. The IUCN Red List of Threatened Species. Version 2014.3” (IUCN, 2012).
264. R. Cuthbert, G. Hilton, Introduced house mice *Mus musculus*: a significant predator of threatened and endemic birds on Gough Island, South Atlantic Ocean? *Biological Conservation*. **117**, 483–489 (2004).
265. P. G. Ryan, J. R. Cuthbert, The biology and conservation status of the Gough bunting *Rowettia goughensis*. *Bulletin of the British Ornithologists' Club*. **128**, 242–253 (2008).
266. Birdlife International, “*Chaunoproctus ferreorostris*. The IUCN Red List of Threatened Species. Version 2014.3” (IUCN, 2012).
267. Birdlife International, “*Ciridops anna*. The IUCN Red List of Threatened Species. Version 2014.3” (IUCN, 2012).
268. S. L. Olson, History, structure, evolution, behaviour, distribution, and ecology of the extinct Hawaiian genus *Ciridops* (Fringillidae, Carduelini, Drepanidini). *The Wilson Journal of Ornithology*. **124**, 651–674 (2012).

269. Birdlife International, "*Cyanoramphus ulietanus*. The IUCN Red List of Threatened Species. Version 2014.3" (IUCN, 2012).
270. J. C. Greenway, *Extinct and vanishing birds of the world* (American Committee for International Wild Life Protection, New York, 1958).
271. Birdlife International, "*Dysmorodrepanis munroi*. The IUCN Red List of Threatened Species. Version 2014.3" (IUCN, 2012).
272. Birdlife International, "*Hemignathus ellisianus*. The IUCN Red List of Threatened Species. Version 2014.3" (2012).
273. Birdlife International, "*Hemignathus flavus*. The IUCN Red List of Threatened Species. Version 2014.3" (IUCN, 2012).
274. Birdlife International, "*Hemignathus kauaiensis*. The IUCN Red List of Threatened Species. Version 2014.3" (IUCN, 2012).
275. C. J. Ralph, S. G. Fancy, Aspects of the life history and foraging ecology of the endangered Akiapolaau. *The Condor*. **98**, 312–321 (1996).
276. S. G. Fancy, S. A. Sandin, M. H. Reynolds, J. D. Jacobi, Distribution and population status of the endangered Akiapola'au. *Pacific Science*. **50**, 355–362 (1996).
277. Birdlife International, "*Gymnomyza samoensis*. The IUCN Red List of Threatened Species. Version 2014.3" (IUCN, 2012).
278. S. M. Pletschet, J. F. Kelly, Breeding biology and nesting success of Palila. *The Condor*. **92**, 1012–1021 (1990).
279. P. C. Banko *et al.*, Availability of food resources, distribution of invasive species, and conservation of a Hawaiian bird along a gradient of elevation. *Journal of Biogeography*. **29**, 789–808 (2002).
280. T. K. Pratt, P. C. Banko, S. G. Fancy, Status and management of the Palila, an endangered Hawaiian honeycreeper, 1987–1996. *Pacific Conservation Biology*. **3**, 330–340 (1997).
281. S. C. Hess, P. C. Banko, "Feral cats: too long a threat to Hawaiian wildlife" (USGS, Hawaii, 2006).
282. Birdlife International, "*Loxops caeruleirostris*. The IUCN Red List of Threatened Species. Version 2014.3" (IUCN, 2012).
283. Birdlife International, "*Loxops coccineus*. The IUCN Red List of Threatened Species. Version 2014.3" (IUCN, 2013).
284. S. Mountainspring, T. Casey, C. B. Kepler, J. M. Scott, Ecology, behavior, and conservation of the Poo-uli (*Melamprosops phaeosoma*). *The Wilson Bulletin*. **102**, 109–122 (1990).
285. Birdlife International, "*Melamprosops phaeosoma*. The IUCN Red List of Threatened Species. Version 2014.3" (IUCN, 2013).
286. Birdlife International, "*Neospiza concolor*. The IUCN Red List of Threatened Species. Version 2014.3" (IUCN, 2013).
287. US Fish and Wildlife Service, "Revised recovery plan for Hawaiian forest birds" (USFWS, Portland, 2006).
288. R. L. Hammond, L. H. Crampton, J. T. Foster, Breeding biology of two endangered forest birds on the island of Kauai, Hawaii. *The Condor*. **117**, 31–40 (2015).
289. Birdlife International, "*Oreomystis mana*. The IUCN Red List of Threatened Species. Version 2014.3" (IUCN, 2013).
290. Birdlife International, "*Palmeria dolei*. The IUCN Red List of Threatened Species. Version 2014.3" (IUCN, 2013).
291. J. C. Simon, T. K. Pratt, K. E. Berlin, J. R. Kowalsky, Reproductive ecology and demography of the 'Ākohekohe. *The Condor*. **103**, 736–745 (2001).
292. L. L. Loope, A. C. Medeiros, Strategies for long-term protection of biological diversity in rainforests of Haleakala National Park and East Maui, Hawaii. *Endangered Species Update*. **12**, 1–5 (1995).
293. Birdlife International, "*Paroreomyza montana*. The IUCN Red List of Threatened Species. Version 2014.3." (IUCN, 2012).
294. C. D. Becker *et al.*, Nest success and parental investment in the critically endangered Maui parrotbill *Pseudonestor xanthophrys* with implications for recovery. *Endangered Species Research*. **11**, 189–194 (2010).
295. S. Mountainspring, Ecology, behavior, and conservation of the Maui parrotbill. *The Condor*. **89**, 24–39 (1987).
296. Birdlife International, "*Psittirostra psittacea*. The IUCN Red List of Threatened Species. Version 2014.3" (IUCN, 2012).
297. Birdlife International, "*Pyrrhula murina*. The IUCN Red List of Threatened Species. Version 2014.3" (IUCN, 2013).
298. M. L. Mathias *et al.*, Mammals from the Azores islands (Portugal): an updated overview. *Mammalia*. **62**, 397–407 (1998).
299. Birdlife International, "*Telespiza ultima*. The IUCN Red List of Threatened Species. Version 2014.3" (IUCN, 2013).
300. Birdlife International, "*Vestiaria coccinea*. The IUCN Red List of Threatened Species. Version 2014.3" (IUCN, 2012).
301. I. Hahn, U. R. mer, R. Schlatter, Nest sites and breeding ecology of the Masafuera Rayadito (*Aphrastura masafuerae*) on Alejandro Selkirk Island, Chile. *Journal of Ornithology*. **145**, 93–97 (2004).

302. J. A. Tomasevic, P. J. Hodum, C. F. Estades, On the ecology and conservation of the critically endangered Masafuera rayadito (*Aphrastura Masafuerae*). *Ornitologia Neotropical*. **21**, 535–543 (2010).
303. Birdlife International, “*Progne modesta*. The IUCN Red List of Threatened Species. Version 2014.3” (IUCN, 2012).
304. Birdlife International, “*Agelaius xanthomus*. The IUCN Red List of Threatened Species. Version 2014.3” (IUCN, 2012).
305. J. W. Wiley, W. Post, A. Cruz, Conservation of the yellow-shouldered blackbird *Agelaius xanthomus*, an endangered West Indian species. *Biological Conservation*. **55**, 119–138 (1991).
306. R. López-Ortiz, E. A. Ventosa-Febles, L. R. Reitsma, D. Hengstenberg, W. Deluca, Increasing nest success in the yellow-shouldered blackbird *Agelaius xanthomus* in southwest Puerto Rico. *Biological Conservation*. **108**, 259–263 (2002).
307. Birdlife International, “*Icterus northropi*. The IUCN Red List of Threatened Species. Version 2014.3” (IUCN, 2013).
308. G. M. Hilton, P. W. Atkinson, G. Gray, W. J. Arendt, Rapid decline of the volcanically threatened Montserrat oriole. *Biological Conservation*. **111**, 79–89 (2003).
309. R. I. Allcorn *et al.*, Demography and breeding ecology of the critically endangered Montserrat oriole. *The Condor*. **114**, 227–235 (2012).
310. Birdlife International, “*Icterus oberi*. The IUCN Red List of Threatened Species. Version 2014.3” (IUCN, 2013).
311. Birdlife International, “*Lanius newtoni*. The IUCN Red List of Threatened Species. Version 2014.3” (IUCN, 2012).
312. Birdlife International, “*Pomarea fluxa*. The IUCN Red List of Threatened Species. Version 2014.3” (IUCN, 2012).
313. Birdlife International, “*Gymnomyza aubryana*. The IUCN Red List of Threatened Species. Version 2014.3” (IUCN, 2013).
314. Birdlife International, “*Myzomela chermesina*. The IUCN Red List of Threatened Species. Version 2014.3” (IUCN, 2012).
315. Birdlife International, “*Notiomystis cincta*. The IUCN Red List of Threatened Species. Version 2015.2” (IUCN, 2013).
316. G. R. Angehr, A bird in the hand: Andreas Reischek and the stitchbird. *Notornis*. **31**, 300–311 (1984).
317. A. Castellanos, R. Rodriguez-Estrella, Current status of the Socorro mockingbird. *Wilson Bulletin*. **105**, 167–171 (1993).
318. J. E. Martínez-Gómez, A. Flores-Palacios, R. L. Curry, Habitat requirements of the Socorro mockingbird *Mimodes graysoni*. *Ibis*. **143**, 456–467 (2001).
319. J. E. Martínez-Gómez, R. L. Curry, The conservation status of the Socorro mockingbird *Mimodes graysoni* in 1993–1994. *Bird Conservation International*. **6**, 271–283 (1996).
320. R. L. Curry, Geographic variation in social organization of Galápagos mockingbirds: ecological correlates of group territoriality and cooperative breeding. *Behavioral Ecology and Sociobiology*. **25**, 147–160 (1989).
321. Birdlife International, “*Mimus melanotis*. The IUCN Red List of Threatened Species. Version 2014.3” (IUCN, 2013).
322. P. R. Grant, R. L. Curry, B. R. Grant, A remnant population of the Floreana mockingbird on Champion island, Galápagos. *Biological Conservation*. **92**, 285–290 (2000).
323. R. L. Curry, Whatever happened to the Floreana Mockingbird? *Noticias de Galapagos*. **43**, 13–15 (1986).
324. Birdlife International, “*Mimus trifasciatus*. The IUCN Red List of Threatened Species. Version 2014.3” (IUCN, 2013).
325. J.-R. Gros-Desormeaux, T. Lesales, A.-G. Tayalay, Behavioral observations on the white-breasted thrasher (*Ramphocinclus brachyurus brachyurus*): conservation implications. *acta ethologica*. **18**, 197–208 (2015).
326. Birdlife International, “*Ramphocinclus brachyurus*. The IUCN Red List of Threatened Species. Version 2014.3” (IUCN, 2012).
327. Birdlife International, “*Toxostoma guttatum*. The IUCN Red List of Threatened Species. Version 2014.3” (IUCN, 2012).
328. Birdlife International, “*Chaetoptila angustipluma*. The IUCN Red List of Threatened Species. Version 2014.3” (IUCN, 2012).
329. Birdlife International, “*Moho bishopi*. The IUCN Red List of Threatened Species. Version 2014.3” (IUCN, 2012).
330. Birdlife International, “*Moho braccatus*. The IUCN Red List of Threatened Species. Version 2014.3” (IUCN, 2012).
331. E. A. VanderWerf, Rodent control decreases predation on artificial nests in O’ahu ‘Elepaio habitat. *Journal of Field Ornithology*. **72**, 448–457 (2001).
332. E. A. VanderWerf, D. G. Smith, Effect of alien rodent control on demography of the O’ahu “Elepaio, an endangered Hawaiian forest bird. *Pacific Conservation Biology*. **8**, 73–81 (2002).
333. E. A. VanderWerf, Importance of nest predation by alien rodents and avian poxvirus in conservation of Oahu Elepaio. *The Journal of Wildlife Management*. **73**, 737–746 (2009).

334. E. A. VanderWerf, Sources of variation in survival, recruitment, and natal dispersal of the Hawaii 'Elepaio. *The Condor*. **110**, 241–250 (2008).
335. E. A. VanderWerf, Demography of Hawaii 'Elepaio: variation with habitat disturbance and population density. *Ecology*. **85**, 770–783 (2004).
336. Birdlife International, "*Chasiempis sclateri*. The IUCN Red List of Threatened Species. Version 2014.3" (IUCN, 2012).
337. Birdlife International, "*Leucopezza semperi*. The IUCN Red List of Threatened Species. Version 2014.3" (IUCN, 2012).
338. Birdlife International, "*Clytorhynchus sanctaerucis*. The IUCN Red List of Threatened Species. Version 2014.3" (IUCN, 2012).
339. H. A. Robertson, J. R. Hay, E. K. Saul, G. V. McCormack, Recovery of the Kakerori: An endangered forest bird of the Cook Islands. *Conservation Biology*. **8**, 1078–1086 (1994).
340. E. K. Saul, H. A. Robertson, A. Tirra, Breeding biology of the Kakerori (*Pomarea dimidiata*) on Rarotonga, Cook Islands. *Notornis*. **45**, 255–269 (1998).
341. J. Seitre, Causes of land-bird extinctions in French Polynesia. *Oryx*. **26**, 215–222 (1992).
342. Birdlife International, "*Pomarea dimidiata*. The IUCN Red List of Threatened Species. Version 2014.3" (IUCN, 2012).
343. J. C. Thibault, J. Y. Meyer, Contemporary extinctions and population declines of the monarchs (*Pomarea* spp.) in French Polynesia, South Pacific. *Oryx*. **35**, 73–80 (2001).
344. J. C. Thibault, J. L. Martin, A. Penloup, J. Y. Meyer, Understanding the decline and extinction of monarchs (Aves) in Polynesian Islands. *Biological Conservation* (2002).
345. Birdlife International, "*Pomarea mendozae*. The IUCN Red List of Threatened Species. Version 2014.3" (IUCN, 2013).
346. Birdlife International, "*Pomarea whitneyi*. The IUCN Red List of Threatened Species. Version 2014.3" (IUCN).
347. D. Currie *et al.*, Conservation options for the critically endangered Seychelles black paradise-flycatcher *Terpsiphone corvina*. *Bird Conservation International*. **13**, 97–114 (2003).
348. D. Currie, R. Bristol, J. Millett, N. J. Shah, Demography of the Seychelles black paradise-flycatcher: considerations for conservation and reintroduction. *Ostrich*. **76**, 104–110 (2005).
349. M. Thorsen, R. Shorten, R. Lucking, V. Lucking, Norway rats (*Rattus norvegicus*) on Frégate Island, Seychelles: the invasion; subsequent eradication attempts and implications for the island's fauna. *Biological Conservation*. **96**, 133–138 (2000).
350. Birdlife International, "*Copsychus sechellarum*. The IUCN Red List of Threatened Species. Version 2014.3" (IUCN, 2012).
351. J. Watson, C. Warman, D. Todd, V. Laboudallon, The Seychelles magpie robin *Copsychus sechellarum*: ecology and conservation of an endangered species. *Biological Conservation*. **61**, 93–106 (1992).
352. Birdlife International, "*Humblotia flavirostris*. The IUCN Red List of Threatened Species. Version 2014.3" (IUCN, 2012).
353. Birdlife International, "*Ergaticus versicolor*. The IUCN Red List of Threatened Species. Version 2014.3" (IUCN, 2012).
354. Birdlife International, "*Xenoligea montana*. The IUCN Red List of Threatened Species. Version 2014.3" (IUCN, 2012).
355. Department of Conservation, "Black robin recovery plan 2001-2011" (Department of Conservation, Wellington, 2001).
356. E. S. Kennedy, "Extinction vulnerability in two small, chronically inbred populations of Chatham Island black robin *Petroica traversi*", thesis, Lincoln University, Lincoln (2009).
357. Birdlife International, "*Pitta superba*. The IUCN Red List of Threatened Species. Version 2014.3" (IUCN, 2013).
358. R. J. Safford, Nesting success of the Mauritius fody *Foudia rubra* in relation to its use of exotic trees as nest sites. *Ibis*. **139**, 555–559 (1997).
359. A. S. Cheke, in *Studies of Mascarene Island birds*, A. W. Diamond, Ed. (Cambridge University Press, Cambridge, 1987), pp. 151–207.
360. Birdlife International, "*Rhipidura malaitae*. The IUCN Red List of Threatened Species. Version 2014.3" (IUCN, 2012).
361. C. E. Easby, S. G. Compton, in *Biodiversity and Societies in the Pacific Islands* (Presses universitaires de Provence, Aix-en-Provence, 2013), pp. 35–50.
362. Birdlife International, "*Aplonis corvina*. The IUCN Red List of Threatened Species. Version 2014.3" (IUCN, 2012).
363. S. L. Olson, An early account of some birds from Mauke, Cook Islands, and the origin of the "mysterious starling" *Aplonis mavornata* Buller. *Notornis*, 197–208 (1986).

364. Birdlife International, "*Aplonis mavornata*. The IUCN Red List of Threatened Species. Version 2014.3" (IUCN, 2012).
365. D. W. Buden, Rediscovery of the Pohnpei Mountain starling (*Aplonis pelzelni*). *The Auk*. **113**, 229–230 (1996).
366. Birdlife International, "*Aplonis santovestris*. The IUCN Red List of Threatened Species. Version 2014.3" (IUCN, 2012).
367. Birdlife International, "*Necropsar rodericanus*. The IUCN Red List of Threatened Species. Version 2014.3" (IUCN, 2012).
368. Birdlife International, "*Acrocephalus aequinoctialis*. The IUCN Red List of Threatened Species. Version 2014.3" (IUCN, 2012).
369. R. J. Camp, T. K. Pratt, A. P. Marshall, F. Amidon, L. L. Williams, Recent status and trends of the land bird avifauna on Saipan, Mariana Islands, with emphasis on the endangered Nightingale Reed-warbler *Acrocephalus luscinia*. *Bird Conservation International*. **19**, 323–337 (2009).
370. D. W. Buden, The birds of Nauru. *Notornis*. **55**, 8–19 (2008).
371. J.-C. Thibault, A. Cibois, The natural history and conservation of *Acrocephalus rimitarae*, the endemic reed-warbler of Rimatara Island, Oceania. *Bulletin of the British Ornithologists' Club*. **126**, 201–206 (2006).
372. Birdlife International, "*Acrocephalus sechellensis*. The IUCN Red List of Threatened Species. Version 2014.3" (IUCN, 2012).
373. G. R. Graves, The endemic land birds of Henderson Island, southeastern Polynesia: notes on natural history and conservation. *Wilson Bulletin*. **104**, 32–43 (1992).
374. Birdlife International, "*Acrocephalus taiti*. The IUCN Red List of Threatened Species. Version 2014.3" (IUCN, 2012).
375. Birdlife International, "*Acrocephalus vaughani*. The IUCN Red List of Threatened Species. Version 2014.3" (IUCN, 2014).
376. Birdlife International, "*Amaurocichla bocagei*. The IUCN Red List of Threatened Species. Version 2014.3" (IUCN, 2013).
377. Birdlife International, "*Bowdleria rufescens*. The IUCN Red List of Threatened Species. Version 2015.2" (IUCN, 2012).
378. Birdlife International, "*Megalurulus grosvenori*. The IUCN Red List of Threatened Species. Version 2014.3" (IUCN, 2012).
379. Birdlife International, "*Nesillas aldabrana*. The IUCN Red List of Threatened Species. Version 2014.3" (IUCN, 2012).
380. C. Hambler, K. Hambler, J. M. Newing, Some observations on *Nesillas aldabranus*, the endangered brush warbler of Alabra Atoll, with hypotheses on its distribution. *Atoll Research Bulletin*. **290**, 1–19 (1985).
381. Birdlife International, "*Phylloscopus amoenus*. The IUCN Red List of Threatened Species. Version 2014.3" (IUCN, 2012).
382. Birdlife International, "*Trichocichla rufa*. The IUCN Red List of Threatened Species. Version 2014.3" (IUCN, 2012).
383. Birdlife International, "*Ferminia cerverai*. The IUCN Red List of Threatened Species. Version 2014.3" (IUCN, 2012).
384. Birdlife International, "*Troglodytes cobbi*. The IUCN Red List of Threatened Species. Version 2014.3" (IUCN, 2012).
385. J. R. Hall, R. W. Woods, M. de L Brooke, G. M. Hilton, Factors affecting the distribution of landbirds on the Falkland Islands. *Bird Conservation International*. **12**, 151–167 (2001).
386. Birdlife International, "*Myadestes myadestinus*. The IUCN Red List of Threatened Species. Version 2014.3" (IUCN, 2012).
387. Birdlife International, "*Myadestes obscurus*. The IUCN Red List of Threatened Species. Version 2014.3" (IUCN, 2012).
388. T. J. Snetsinger, C. M. Herrmann, D. E. Holmes, C. D. Hayward, S. G. Fancy, Breeding Ecology of the Puaiohi (*Myadestes palmeri*). *The Wilson Bulletin*. **117**, 72–84 (2005).
389. E. J. Tweed *et al.*, Breeding biology and success of a reintroduced population of the critically endangered Puaiohi (*Myadestes palmeri*). *The Auk*. **123**, 753–763 (2006).
390. C. B. Kepler, A. K. Kepler, A first record of the nest and chicks of the small Kauai thrush. *The Condor*. **85**, 497–499 (1983).
391. Birdlife International, "*Turdus celaenops*. The IUCN Red List of Threatened Species. Version 2014.3" (IUCN, 2012).
392. Birdlife International, "*Turdus lherminieri*. The IUCN Red List of Threatened Species. Version 2014.3" (IUCN, 2012).
393. P. K. Ndonganga *et al.*, "International species action plan for the spotted ground thrush *Zoothera guttata*" (Birdlife International and Royal Society for the Protection of Birds, Nairobi and Bedfordshire, 2005).
394. Birdlife International, "*Zoothera turipavae*. The IUCN Red List of Threatened Species. Version 2014.3" (IUCN, 2012).
395. D. G. Medway, The land bird fauna of Stephens Island, New Zealand in the early 1890s, and the cause of its demise. *Notornis*. **51**, 201–211 (2004).
396. Birdlife International, "*Turnagra tanagra*. The IUCN Red List of Threatened Species. Version 2015.2" (IUCN, 2012).
397. Birdlife International, "*Nesotriccus ridgwayi*. The IUCN Red List of Threatened Species. Version 2014.3" (IUCN, 2012).

398. G. Dutson, Population densities and conservation status of Norfolk Island forest birds. *Bird Conservation International*. **23**, 271–282 (2012).
399. R. K. Nichols, L. G. Woolaver, C. G. Jones, Low productivity in the critically endangered Mauritius olive white-eye *Zosterops chloronothos*. *Bird Conservation International*. **15**, 297–7 (2005).
400. G. Maggs *et al.*, *Rattus* management is essential for population persistence in a critically endangered passerine: Combining small-scale field experiments and population modelling. *Biological Conservation*. **191**, 274–281 (2015).
401. Birdlife International, “*Zosterops modestus*. The IUCN Red List of Threatened Species. Version 2014.3” (IUCN, 2012).
402. Birdlife International, “*Zosterops mouroniensis*. The IUCN Red List of Threatened Species. Version 2014.3” (IUCN, 2012).
403. Birdlife International, “*Zosterops nehrkorni*. The IUCN Red List of Threatened Species. Version 2014.3” (IUCN, 2012).
404. L. Berry, E. Taisacan, Nest success and nest predation of the endangered Rota white-eye (*Zosterops rotensis*). *The Wilson Journal of Ornithology*. **120**, 618–619 (2008).
405. R. J. Craig, “Conservation of endangered white-eyes (Zosteropidae) in the tropical Pacific” (Bird Conservation Research Inc., Putnam, 1999).
406. K. A. Hindwood, The birds of Lord Howe Island. *Emu*. **40**, 1–86 (1940).
407. C. F. J. O’Donnell, Breeding of the Australasian bittern (*Botaurus poiciloptilus*) in New Zealand. *Emu*. **111**, 197–5 (2011).
408. P. J. Smith, R. L. Pressey, J. E. Smith, Birds of particular conservation concern in the Western Division of New South Wales. *Biological Conservation*. **69**, 315–338 (1994).
409. Birdlife International, “*Gorsachius goisagi*. The IUCN Red List of Threatened Species. Version 2014.3” (IUCN, 2012).
410. Birdlife International, “*Ixobrychus novaezelandiae*. The IUCN Red List of Threatened Species. Version 2015.2” (IUCN, 2014).
411. Birdlife International, “*Nyctanassa carcinocatactes*. The IUCN Red List of Threatened Species. Version 2014.3” (IUCN, 2014).
412. Birdlife International, “*Colaptes oceanicus*. The IUCN Red List of Threatened Species. Version 2014.3” (IUCN, 2014).
413. Birdlife International, “*Dendrocopos noguchii*. The IUCN Red List of Threatened Species. Version 2014.3” (IUCN, 2012).
414. I. Roesler, S. Imberti, H. Casanas, N. Volpe, A new threat for the globally endangered hooded grebe *Podiceps gallardoi*: the American mink *Neovison vison*. *Bird Conservation International*. **22**, 383–388 (2012).
415. I. Roesler, S. Imberti, H. Casanas, B. Mahler, J. C. Rebores, Hooded grebe *Podiceps gallardoi* population decreased by eighty per cent in the last twenty-five years. *Bird Conservation International*. **22**, 371–382 (2012).
416. ACAP, “ACAP species assessments: Amsterdam albatross *Diomedea amsterdamensis*” (Agreement on the Conservation of Albatrosses and Petrels, 2010), (available at <http://www.acap.aq>).
417. J.-B. Thiebot, C. Barbraud, K. Delord, C. Marteau, H. Weimerskirch, Do introduced mammals chronically impact the breeding success of the world’s rarest albatross? *Ornithological Science*. **13**, 41–46 (2014).
418. ACAP, “ACAP species assessment: Antipodean albatross *Diomedea antipodensis*.” (Agreement on the Conservation of Albatrosses and Petrels, 2009).
419. R. Cuthbert, E. Sommer, P. Ryan, J. Cooper, G. Hilton, Demography and conservation of the Tristan albatross *Diomedea [exulans] dabbenena*. *Biological Conservation*. **117**, 471–481 (2004).
420. R. M. Wanless *et al.*, From both sides: Dire demographic consequences of carnivorous mice and longlining for the critically endangered Tristan albatrosses on Gough Island. *Biological Conservation*. **142**, 1710–1718 (2009).
421. R. M. Wanless, A. Angel, R. J. Cuthbert, G. M. Hilton, P. G. Ryan, Can predation by invasive mice drive seabird extinctions? *Biology Letters*. **3**, 241–244 (2007).
422. M. W. Fraser, P. G. Ryan, B. P. Watkins, The seabirds of Inaccessible Island, South Atlantic Ocean. *Cormorant*. **16**, 7–33 (1988).
423. C. J. R. Robertson, “Effects of intervention on the royal albatross population at Taiaroa Head, Otago, 1937-2001” (Department of Conservation, Wellington, 2001).
424. Birdlife International, “*Phoebastria albatrus*. The IUCN Red List of Threatened Species. Version 2014.3” (2012).
425. Birdlife International, “*Phoebastria irrorata*. The IUCN Red List of Threatened Species. Version 2014.3” (IUCN, 2014).
426. ACAP, “ACAP species assessments: sooty albatross *Phoebetria fusca*” (Agreement on the Conservation of Albatrosses and Petrels, 2010), (available at <http://www.acap.aq>).

427. M. G. W. Jones, P. G. Ryan, Evidence of mouse attacks on albatross chicks on sub-Antarctic Marion Island. *Antarctic Science*. **22**, 39–42 (2010).
428. R. J. Cuthbert, H. Louw, G. Parker, K. Rexer-Huber, P. Visser, Observations of mice predation on dark-mantled sooty albatross and Atlantic yellow-nosed albatross chicks at Gough Island. *Antarctic Science*. **25**, 763–766 (2013).
429. ACAP, “ACAP species assessments: Indian yellow-nosed albatross *Thalassarche carteri*” (Agreement on the Conservation of Albatrosses and Petrels, 2009), (available at <http://www.acap.aq>).
430. ACAP, “ACAP species assessment: Atlantic yellow-nosed albatross *Thalassarche chlororhynchos*” (Agreement on the Conservation of Albatrosses and Petrels, 2009), (available at <http://www.acap.aq>).
431. Birdlife International, “*Hydrobates homochroa*. The IUCN Red List of Threatened Species. Version 2014.3” (IUCN, 2013).
432. W. J. Sydeman, N. Nur, E. B. McLaren, G. J. McChesney, Status and trends of the ashy storm-petrel on southeast Farallon Island, California, based upon capture-recapture analyses. *The Condor*. **100**, 438–447 (1998).
433. Birdlife International, “*Hydrobates matsudairae*. The IUCN Red List of Threatened Species. Version 2014.3” (IUCN, 2014).
434. Birdlife International, “*Pseudobulweria becki*. The IUCN Red List of Threatened Species. Version 2014.3” (IUCN, 2013).
435. Birdlife International, “*Nesofregetta fuliginosa*. The IUCN Red List of Threatened Species. Version 2014.3” (IUCN, 2012).
436. H. P. Jones *et al.*, Severity of the effects of invasive rats on seabirds: a global review. *Conservation Biology*. **22**, 16–26 (2008).
437. J. Jahncke, E. Goya, The status of the Peruvian diving-petrel population at its main breeding areas along the coast of Peru. *Colonial Waterbirds*. **21**, 94–97 (1998).
438. B. Araya, D. C. Duffy, Animal introductions to Isla Chanaral, Chile; their history and effect on seabirds. *Cormorant*. **15**, 3–6 (1987).
439. P. Jouventin, J. Bried, T. Micol, Insular bird populations can be saved from rats: a long-term experimental study of white-chinned petrels *Procellaria aequinoctialis* on Ile de la Possession (Crozet archipelago). *Polar Biology*. **26**, 371–378 (2003).
440. P. Van Rensburg, M. N. Bester, The effect of cat *Felis catus* predation on three breeding Procellariidae species on Marion Island. *South African Journal of Zoology*. **23**, 301–305 (1988).
441. P. G. Ryan, The taxonomic and conservation status of the spectacled petrel *Procellaria conspicillata*. *Bird Conservation International*. **8**, 223–235 (1998).
442. P. G. Ryan, C. Dorse, G. M. Hilton, The conservation status of the spectacled petrel *Procellaria conspicillata*. *Biological Conservation*. **131**, 575–583 (2006).
443. M. J. Imber, Breeding ecology and conservation of the black petrel (*Procellaria parkinsonii*). *Notornis*. **34**, 19–39 (1987).
444. E. A. Bell, J. L. Sim, P. Scofield, C. Francis, “Population parameters of the black petrels (*Procellaria parkinsoni*) on Great Barrier Island (Aotea Island), 2009/10” (Department of Conservation, Wellington, 2011).
445. Birdlife International, “*Pseudobulweria aterrima*. The IUCN Red List of Threatened Species. Version 2014.3” (IUCN, 2013).
446. D. Priddel, N. Carlile, K. Moce, D. Watling, A review of records and recovery actions for the “Critically Endangered” Fiji petrel *Pseudobulweria macgillivrayi*. *Bird Conservation International*. **18**, 381–14 (2008).
447. Birdlife International, “*Pterodroma alba*. The IUCN Red List of Threatened Species. Version 2014.3” (2012).
448. B. Gangloff, P. Raust, J.-C. Thibault, V. Bretagnolle, Notes on the Phoenix Petrel (*Pterodroma alba*) from Hatuta'a Island, Marquesas. *Waterbirds*. **32**, 453–458 (2009).
449. Birdlife International, “*Pterodroma arminjoniana*. The IUCN Red List of Threatened Species. Version 2014.3” (IUCN, 2012).
450. M. de L. Brooke *et al.*, Potential for rat predation to cause decline of the globally threatened Henderson petrel *Pterodroma atrata*: evidence from the field, stable isotopes and population modelling. **11**, 47–59 (2010).
451. M. L. Brooke, The breeding biology of the gadfly petrels *Pterodroma* spp. of the Pitcairn Islands: characteristics, population sizes and controls. *Biological Journal of the Linnean Society*. **56**, 213–231 (1995).
452. J. M. Probst, M. Le Corre, C. Thébaud, Breeding habitat and conservation priorities in *Pterodroma baraui*, an endangered gadfly petrel of the Mascarene archipelago. *Biological Conservation*. **93**, 135–138 (2000).
453. Birdlife International, “*Pterodroma baraui*. The IUCN Red List of Threatened Species. Version 2014.3” (IUCN, 2012).
454. L. Faulquier, R. Fontaine, E. Vidal, M. Salamolard, M. Le Corre, Feral cats *Felis catus* threaten the endangered endemic Barau's petrel *Pterodroma baraui* at Reunion Island (Western Indian Ocean). *Waterbirds*. **32**, 330–336 (2009).
455. Birdlife International, “*Pterodroma brevipes*. The IUCN Red List of Threatened Species. Version 2014.3” (IUCN, 2012).

456. D. Watling, Notes of the Collared Petrel *Pterodroma (leucoptera) brevipes*. *Bulletin of the British Ornithologists' Club*. **106**, 63–70 (1986).
457. US Fish and Wildlife Service, “Cahow or Bermuda petrel (*Pterodroma cahow*) 5-Year review: summary and evaluation” (U.S. Fish and Wildlife Service, Raleigh, 2013), pp. 1–20.
458. J. Madeiros, N. Carlile, D. Priddel, Breeding biology and population increase of the endangered Bermuda petrel *Pterodroma cahow*. *Bird Conservation International*. **22**, 35–45 (2012).
459. J. Madeiros, Cahow nesting season update April 2008. *Bermuda Audubon Society Newsletter*. **19**, 2–5 (2008).
460. Birdlife International, “*Pterodroma caribbaea*. The IUCN Red List of Threatened Species. Version 2014.3” (IUCN, 2013).
461. C. R. Veitch, C. M. Miskelly, G. A. Harper, G. A. Taylor, A. Tennyson, Birds of the Kermadec Islands, south-west Pacific. *Notornis*. **51**, 61–90 (2004).
462. M. J. Rayner, M. E. Hauber, M. J. Imber, R. K. Stamp, M. N. Clout, Spatial heterogeneity of mesopredator release within an oceanic island system. *Proceedings of the National Academy of Sciences*. **104**, 20862–20865 (2007).
463. M. J. Imber, J. A. West, W. J. Cooper, Cook's petrel (*Pterodroma cookii*): historic distribution, breeding biology and effects of predators. *Notornis*. **50**, 221–230 (2003).
464. M. J. Rayner, K. A. Parker, M. J. Imber, Population census of Cook's petrel *Pterodroma cookii* breeding on Codfish Island (New Zealand) and the global conservation status of the species. *Bird Conservation International*. **18**, 211–218 (2008).
465. Birdlife International, “*Pterodroma defilippiana*. The IUCN Red List of Threatened Species. Version 2014.3” (IUCN, 2012).
466. M. de L Brooke, Population estimates and breeding biology of the petrels *Pterodroma externa* and *P. longirostris* on Isla Alejandro Selkirk, Juan Fernandez Archipelago. *Condor*. **89**, 581–586 (1987).
467. Birdlife International, “*Pterodroma externa*. The IUCN Red List of Threatened Species. Version 2014.3” (IUCN, 2012).
468. R. Cuthbert, Breeding biology of the Atlantic petrel, *Pterodroma incerta*, and a population estimate of this and other burrowing petrels on Gough Island, South Atlantic Ocean. *Emu*. **104**, 221–228 (2004).
469. R. M. Wanless *et al.*, Predation of Atlantic petrel chicks by house mice on Gough Island. *Animal Conservation*. **15**, 472–479 (2012).
470. P. Hodum, M. Wainstein, “Biology and conservation of the Juan Fernández Archipelago seabird community” (Unpublished report, 2003).
471. F. Zino *et al.*, Conservation of Zino's petrel *Pterodroma madeira* in the archipelago of Madeira. *Oryx*. **35**, 128–136 (2001).
472. Department of Conservation, “Chatham Island taiko recovery plan 2001–2011” (Department of Conservation, Wellington, 2001).
473. F. Cruz-Delgado, J. A. Gonzalez, D. A. Wiedenfeld, Breeding biology of the critically endangered Galapagos petrel *Pterodroma phaeopygia* on San Cristóbal Island: conservation and management implications. *Bird Conservation International*. **20**, 306–319 (2010).
474. J. B. Cruz, F. Cruz, Conservation of the dark-rumped petrel *Pterodroma phaeopygia* in the Galapagos Islands, Ecuador. **42**, 303–311 (1987).
475. J. B. Cruz, F. Cruz, Conservation of the dark-rumped petrel *Pterodroma phaeopygia* of the Galápagos Islands, 1982–1991. *Bird Conservation International*. **6**, 23–32 (1996).
476. R. J. Pierce, “Kiore (*Rattus exulans*) impact on breeding success of Pycroft's petrels and little shearwaters” (Department of Conservation, Wellington, 2002).
477. Birdlife International, “*Pterodroma rupinarum*. The IUCN Red List of Threatened Species. Version 2014.3” (IUCN, 2012).
478. N. Carlile, D. Priddel, F. Zino, C. Natividad, D. B. Wingate, A review of four successful recovery programmes for threatened sub-tropical petrels. *Marine Ornithology*. **31**, 185–192 (2003).
479. T. R. Simons, Biology and behavior of the endangered Hawaiian dark-rumped petrel. *The Condor*. **87**, 229–245 (1985).
480. C. Hodges, R. J. Nagata, in *Evolution, ecology, conservation and management of Hawaiian birds a vanishing avifauna*, J. M. Scott, S. Conant, C. van Riper, Eds. (2003), vol. 22, pp. 308–318.
481. S. Judge, J. S. Lippert, K. Misajon, D. Hu, S. C. Hess, Videographic evidence of endangered species depredation by feral cat. *Pacific Conservation Biology*. **18**, 293–296 (2012).
482. D. C. Duffy, P. I. Capece, Depredation of endangered burrowing seabirds in Hawai'i: management priorities. *Marine Ornithology*. **42**, 149–152 (2014).



483. T. R. Simons, A population model of the endangered Hawaiian dark-rumped petrel. *Journal of Wildlife Management*. **48**, 1065–1076 (1984).
484. T. R. Simons, "Biology and conservation of the endangered Hawaiian dark-rumped Petrel (*Pterodroma phaeopygia sandwichensis*)", thesis, University of Washington (1983).
485. A. J. Bester, D. Priddel, N. I. Klomp, N. Carlile, Reproductive success of the providence petrel *Pterodroma solandri* on Lord Howe Island, Australia. *Marine Ornithology*. **35**, 21–28 (2007).
486. D. G. Medway, History and causes of the extirpation of the Providence petrel (*Pterodroma solandri*) on Norfolk Island. *Notornis*. **49**, 246–258 (2002).
487. J. E. Martínez-Gómez, J. K. Jacobsen, The conservation status of Townsend's shearwater *Puffinus auricularis auricularis*. *Biological Conservation*. **116**, 35–47 (2004).
488. S. Howell, S. Webb, Additional notes from Isla Clarion, Mexico. *Condor*. **91**, 1007–1008 (1989).
489. Birdlife International, "*Puffinus bannermani*. The IUCN Red List of Threatened Species. Version 2014.3" (IUCN, 2014).
490. K. Kawakami et al., Bryan's shearwaters have survived on the Bonin Islands, northwestern Pacific. *The Condor*. **114**, 507–512 (2012).
491. Birdlife International, "*Puffinus heinrothi*. The IUCN Red List of Threatened Species. Version 2014.3" (IUCN, 2013).
492. E. Sommer et al., Population trends, breeding success and predation rates of Hutton's shearwater (*Puffinus huttoni*): a 20 year assessment. *Notornis*. **56**, 144–153 (2009).
493. R. Cuthbert, L. S. Davis, The impact of predation by introduced stoats on Hutton's shearwaters, New Zealand. *Biological Conservation*. **108**, 79–92 (2002).
494. R. Cuthbert, The role of introduced mammals and inverse density-dependent predation in the conservation of Hutton's shearwater. *Biological Conservation*. **108**, 69–78 (2002).
495. J. M. Arcos, "International species action plan for the Balearic shearwater, *Puffinus mauretanicus*" (SEO/Birdlife and Birdlife International, 2011).
496. R. H. Day, B. A. Cooper, T. C. Telfer, Decline of Townsend's (Newell's) shearwaters (*Puffinus auricularis newelli*) on Kauai, Hawaii. *The Auk*. **120**, 669–679 (2003).
497. Birdlife International, "*Puffinus newelli*. The IUCN Red List of Threatened Species. Version 2014.3" (IUCN, 2013).
498. K. Bourgeois, E. Vidal, The endemic Mediterranean yelkouan shearwater *Puffinus yelkouan*: distribution, threats and a plea for more data. *Oryx*. **42**, 187–194 (2008).
499. K. Bourgeois et al., Dramatic increase in the Zembretta yelkouan shearwater breeding population following ship rat eradication spurs interest in managing a 1500-year old invasion. *Biological Invasions*. **15**, 475–482 (2013).
500. S. Oppel et al., Is the yelkouan shearwater *Puffinus yelkouan* threatened by low adult survival probabilities? *Biological Conservation*. **144**, 2255–2263 (2011).
501. E. Bonnaud, G. Berger, K. Bourgeois, J. Legrand, E. Vidal, Predation by cats could lead to the extinction of the Mediterranean endemic yelkouan shearwater *Puffinus yelkouan* at a major breeding site. *Ibis*. **154**, 566–577 (2012).
502. E. Bonnaud, K. Bourgeois, E. Vidal, J. Legrand, M. Le Corre, How can the yelkouan shearwater survive feral cat predation? A meta-population structure as a solution? *Population Ecology*. **51**, 261–270 (2009).
503. E. Bonnaud et al., Top-predator control on islands boosts endemic prey but not mesopredator. *Animal Conservation*. **13**, 556–567 (2010).
504. Birdlife International, "*Cacatua haematuropygia*. The IUCN Red List of Threatened Species. Version 2015.1" (IUCN, 2013).
505. A. Rodríguez-Ferraro, V. Sanz, Natural history and population status of the yellow-shouldered parrot on La Blanquilla Island, Venezuela. *The Wilson Journal of Ornithology*. **119**, 602–609 (2007).
506. R. Engeman et al., Monitoring invasive mammalian predator populations sharing habitat with the critically endangered Puerto Rican parrot *Amazona vittata*. *Oryx*. **40**, 95–102 (2005).
507. W. J. Arendt, Impact of nest predators, competitors, and ectoparasites on pearly-eyed thrashers, with comments on the potential implications for Puerto Rican parrot recovery. *Ornitologia Neotropical*. **11**, 13–63 (2000).
508. Birdlife International, "*Chamosyna amabilis*. The IUCN Red List of Threatened Species. Version 2014.3" (IUCN, 2012).
509. Birdlife International, "*Chamosyna diadema*. The IUCN Red List of Threatened Species. Version 2014.3" (2013, 2013).
510. A. Reuleaux et al., Breeding ecology of the Seychelles black parrot *Coracopsis barklyi*. *Ostrich*. **85**, 255–265 (2014).

511. Birdlife International, “*Coracopsis barklyi*. The IUCN Red List of Threatened Species. Version 2014.3” (IUCN, 2014).
512. Birdlife International, “*Cyanoramphus malherbi*. The IUCN Red List of Threatened Species. Version 2015.2” (IUCN, 2013).
513. Birdlife International, “*Cyanoramphus zealandicus*. The IUCN Red List of Threatened Species. Version 2014.3” (IUCN, 2012).
514. Birdlife International, “*Eclectus infectus*. The IUCN Red List of Threatened Species. Version 2014.3” (IUCN, 2014).
515. O. Robinet, J. L. Craig, L. Chardonnet, Impact of rat species in Ouvea and Lifou (Loyalty Islands) and their consequences for conserving the endangered Ouvea Parakeet. *Biological Conservation*. **86**, 223–232 (1998).
516. O. Robinet, F. Beugnet, D. Dulieu, P. Chardonnet, The Ouvéa parakeet – state of knowledge and conservation status. *Oryx*. **29**, 143–150 (1995).
517. Orange-bellied Parrot Recovery Team, “National recovery plan for the orange-bellied parrot (*Neophema chrysogaster*)” (Department of Primary Industries and Water, Hobart, 2006).
518. C. H. H. Jerrard, Historical Article: Paradise Parrot. *Australian Field Ornithology*. **25**, 59–68 (2008).
519. A. G. Greenwood, The Echo responds - a partnership between conservation biology, aviculture and veterinary science. *PsittaScene*. **8**, 6–7 (1996).
520. Birdlife International, “*Psittacula eques*. The IUCN Red List of Threatened Species. Version 2014.3” (IUCN, 2013).
521. G. McCormack, J. Künzlè, The 'Ura or Rimatara Lorikeet *Vini kuhlii*: its former range, present status, and conservation priorities. *Bird Conservation International*. **6**, 325–334 (1996).
522. D. Watling, Notes on the status of Kuhl's lorikeet *Vini kuhlii* in the Northern Line Islands, Kiribati. *Bird Conservation International*. **5**, 481–489 (2010).
523. Birdlife International, “*Vini kuhlii*. The IUCN Red List of Threatened Species. Version 2014.3.” (2013).
524. Birdlife International, “*Vini peruviana*. The IUCN Red List of Threatened Species. Version 2014.3” (IUCN, 2012).
525. C. Kuehler *et al.*, Translocation of ultramarine lorries *Vini ultramarina* in the Marquesas Islands: Ua Huka to Fatu Hiva. *Bird Conservation International*. **7**, 69–79 (1997).
526. R. Moorhouse *et al.*, Control of introduced mammalian predators improves kaka *Nestor meridionalis* breeding success: reversing the decline of a threatened New Zealand parrot. *Biological Conservation*. **110**, 33–44 (2003).
527. P. R. Wilson, B. J. Karl, R. J. Toft, J. R. Beggs, R. H. Taylor, The role of introduced predators and competitors in the decline of kaka (*Nestor meridionalis*) populations in New Zealand. *Biological Conservation*. **83**, 175–185 (1998).
528. P. Dilks, M. J. Willans, M. Pryde, I. Fraser, Large scale stoat control to protect mohua (*Mohoua ochrocephala*) and kaka (*Nestor meridionalis*) in the Eglinton Valley, Fiordland, New Zealand. *New Zealand Journal of Ecology*. **27**, 1–9 (2003).
529. T. C. Greene, R. G. Powlesland, P. J. Dilks, L. Moran, “Research summary and options for conservation of kaka (*Nestor meridionalis*)” (Department of Conservation, Wellington, 2004).
530. G. Elliott, J. Kemp, “Effect of hunting and predation on kea, and a method of monitoring kea populations: results of kea research on the St Arnaud Range” (Department of Conservation, Wellington, 2004).
531. G. P. Elliott, D. V. Merton, P. W. Jansen, Intensive management of a critically endangered species: the kakapo. *Biological Conservation*. **99**, 121–133 (2001).
532. B. D. Lloyd, R. G. Powlesland, The decline of kakapo *Strigops habroptilus* and attempts at conservation by translocation. *Biological Conservation*. **69**, 75–85 (1994).
533. M. N. Clout, D. V. Merton, Saving the kakapo: the conservation of the world's most peculiar parrot. *Bird Conservation International*. **8**, 281–296 (1998).
534. R. J. Moorhouse, R. G. Powlesland, Aspects of the ecology of kakapo *Strigops habroptilus* liberated on Little Barrier Island (Hauturu), New Zealand. *Biological Conservation*. **56**, 349–365 (1991).
535. A. Berruti, The status of the royal penguin and fairy prion at Marion Island, with notes on feral cat predation on nestlings of large birds. *Cormorant*. **9**, 123–128 (1981).
536. D. Pontier *et al.*, The diet of feral cats (*Felis catus* L.) at five sites on the Grande Terre, Kerguelen archipelago. *Polar Biology*. **25**, 833–837 (2002).
537. Birdlife International, “*Eudyptes chrysolophus*. The IUCN Red List of Threatened Species” (IUCN, 2013).
538. R. Cuthbert *et al.*, Population trends and conservation status of the northern rockhopper penguin *Eudyptes moseleyi* at Tristan da Cunha and Gough Island. *Bird Conservation International*. **19**, 109–120 (2009).

539. Birdlife International, "Rockhopper penguins: a plan for research and conservation action to investigate and address population changes. Proceedings of an international workshop, Edinburgh, 3-5 June 2008" (Birdlife International, 2010).
540. S. Ellis, J. P. Croxall, J. Cooper, "Penguin conservation assessment and management plan: report from the workshop held 8-9 September 1996, Cape Town, South Africa" (IUCN/SSC Conservation Breeding Specialist Group, Apple Valley, 1998).
541. J. Warham, The fiordland crested penguin *Eudyptes pachyrhynchus*. *The Ibis*. **116**, 1–27 (1974).
542. Birdlife International, "*Mayrornis versicolor*. The IUCN Red List of Threatened Species. Version 2014.3" (IUCN, 2012).
543. H. Ratz, B. Murphy, Effects of habitat and introduced mammalian predators on the breeding success of yellow-eyed penguins *Megadyptes antipodes*, South Island, New Zealand. *Pacific Conservation Biology*. **5**, 16–27 (1999).
544. J. T. Darby, P. J. Seddon, in *Penguin biology*, L. S. Davis, J. T. Darby, Eds. (Penguin biology, San Diego, 1990), pp. 45–62.
545. M. Massaro, D. Blair, Comparison of population numbers of yellow-eyed penguins, *Megadyptes antipodes*, on Stewart Island and on adjacent cat-free islands. *New Zealand Journal of Ecology*. **27**, 107–113 (2003).
546. Birdlife International, "*Spheniscus demersus*. The IUCN Red List of Threatened Species. Version 2015.1" (IUCN, 2013).
547. UNEP World Conservation Monitoring Centre, "Report on the status and conservation of the Humboldt penguin *Spheniscus humboldti*" (UNEP World Conservation Monitoring Centre, Cambridge, 2004).
548. B. A. Modinger *et al.*, "Population and habitat viability assessment for the Humboldt penguin (*Spheniscus humboldti*). Final report" (ICUN/SSC Conservation Breeding Specialist Group, Apple Valley, 2000).
549. A. Simeone, G. Luna-Jorquera, Estimating rat predation on Humboldt penguin colonies in north-central Chile. *Journal of Ornithology*. **153**, 1079–1085 (2012).
550. A. Steinfurth, "Marine ecology and conservation of the Galápagos penguin, *Spheniscus mendiculus*", thesis, University of Kiel (2007).
551. S. L. Deem *et al.*, Exposure to *Toxoplasma gondii* in Galapagos penguins (*Spheniscus mendiculus*) and flightless cormorants (*Phalacrocorax harrisi*) in the Galapagos Islands, Ecuador. *Journal of Wildlife Diseases*. **46**, 1005–1011 (2010).
552. Birdlife International, "*Aegolius gradyi*. The IUCN Red List of Threatened Species. Version 2014.3" (IUCN, 2014).
553. Birdlife International, "*Mascarenotus grucheti*. The IUCN Red List of Threatened Species. Version 2014.3" (IUCN, 2012).
554. Birdlife International, "*Mascarenotus murivorus*. The IUCN Red List of Threatened Species. Version 2014.3" (IUCN, 2012).
555. Birdlife International, "*Mascarenotus sauzieri*. The IUCN Red List of Threatened Species. Version 2014.3" (IUCN, 2012).
556. R. J. Safford, Rediscovery, taxonomy and conservation of the Anjouan Scops Owl *Otus capnodes* (Gurney 1889). *Bird Conservation International*. **3**, 57–74 (1993).
557. R. Fanchette, C. Hoareau, D. Currie, S. J. Parr, First nest record for the Seychelles (bare-legged) Scops Owl *Otus insularis*. *Ibis*. **142**, 485–486 (2000).
558. D. Currie, R. Fanchette, J. Millett, C. Hoareau, N. J. Shah, The breeding biology of the critically endangered Seychelles Scops-owl *Otus insularis*: consequences for conservation and management. *Bird Conservation International*. **14**, 123–137 (2004).
559. D. Currie, R. Fanchette, J. Millett, C. Hoareau, N. J. Shah, The distribution and population of the Seychelles (bare-legged) Scops Owl *Otus insularis* on Mahé: consequences for conservation. *Ibis*. **146**, 27–37 (2004).
560. Birdlife International, "*Otus insularis*. The IUCN Red List of Threatened Species. Version 2014.3" (IUCN, 2012).
561. Birdlife International, "*Otus moheliensis*. The IUCN Red List of Threatened Species. Version 2014.3" (IUCN, 2012).
562. Birdlife International, "*Otus pauliani*. The IUCN Red List of Threatened Species. Version 2014.3" (IUCN, 2012).
563. G. R. Williams, M. Harrison, The laughing owl *Sceloglaux albifacies* (Gray, 1844): a general survey of a near-extinct species. *Notornis*. **19**, 4–19 (1972).
564. J. A. McLennan *et al.*, Role of predation in the decline of kiwi, *Apteryx* spp., in New Zealand. *New Zealand Journal of Ecology*. **20**, 27–35 (1996).
565. C. A. Gillies *et al.*, Six years of intensive pest mammal control at Trounson Kauri Park, a Department of Conservation "mainland island," June 1996–July 2002. *New Zealand Journal of Ecology*. **30**, 399–420 (2003).
566. J. A. McLennan, L. Dew, J. Miles, N. Gillingham, R. Waiwai, Size matters: predation risk and juvenile growth in North Island brown kiwi (*Apteryx mantelli*). *New Zealand Journal of Ecology*. **28**, 241–250 (2004).
567. Birdlife International, "*Apteryx australis*. The IUCN Red List of Threatened Species 2013: e.T22678122A48125810." (IUCN, 2013).

568. B. Basse, J. A. McLennan, G. C. Wake, Analysis of the impact of stoats, *Mustela erminea*, on northern brown kiwi, *Apteryx mantelli*, in New Zealand. *Wildlife Research*. **26**, 227–237 (1999).
569. J. McLennan, T. McCann, in *Some early 1990s studies in kiwi Apteryx spp. genetics and management*. *Science & Research Internal Report 191*, F. Overmars, Ed. (2002), pp. 35–56.
570. H. A. Robertson, R. M. Colbourne, P. J. Graham, P. J. Miller, R. J. Pierce, Experimental management of brown kiwi *Apteryx mantelli* in central Northland, New Zealand. *Bird Conservation International*. **21**, 207–220 (2010).
571. A. S. Glen, T. Hamilton, D. McKenzie, W. A. Ruscoe, A. E. Byrom, Kiwi population recovery through community-led pest management in Northland, New Zealand. *Conservation Evidence*. **9**, 22–27 (2012).
572. P. J. Miller, R. J. Pierce, Distribution and decline of the North Island brown kiwi (*Apteryx australis mantelli*) in Northland. *Notornis*. **42**, 203–211 (1995).
573. Birdlife International, “*Apteryx rowi*. The IUCN Red List of Threatened Species. Version 2015.2” (IUCN, 2014).
574. N. P. Ashmole, M. J. Ashmole, K. Simmons, in *Seabirds on islands threats, case studies, and action plans*, D. N. Nettleship, J. Burger, M. Gochfield, Eds. (BirdLife Conservation Series, Cambridge, 1994), pp. 94–121.
575. Birdlife International, “*Phalacrocorax colensoi*. The IUCN Red List of Threatened Species. Version 2014.3” (IUCN, 2012).
576. M. Bell, D. Bell, Census of the three shag species in the Chatham Islands. *Notornis*. **47**, 148–153 (2000).
577. Birdlife International, “*Phalacrocorax harrisi*. The IUCN Red List of Threatened Species. Version 2014.3” (IUCN, 2013).
578. M. Du Toit *et al.*, “Conservation assessment and management plan for southern African coastal seabirds” (Avian Demography Unit, University of Cape Town and IUCN/SSC Conservation Breeding Specialist Group, Cape Town and Apple Valley, 2003).
579. S. B. Muzaffar, S. D. Benjamin, R. E. Gubiani, The impact of fox and feral cat predation on the population viability of the threatened, endemic socotra cormorant on Siniya Island, United Arab Emirates. *Marine Ornithology*. **41**, 171–177 (2013).
580. G. Bronner, S. Mynhardt, “*Amblysomus marleyi*. The IUCN Red List of Threatened Species. Version 2015.2” (IUCN, 2015).
581. C. Rampartab, “*Amblysomus robustus*. The IUCN Red List of Threatened Species. Version 2015.2” (IUCN, 2015).
582. G. Bronner, “*Carpitalpa arendsi*. The IUCN Red List of Threatened Species. Version 2015.2” (IUCN, 2015).
583. G. Bronner, “*Chlorotalpa duthieae*. The IUCN Red List of Threatened Species. Version 2015.2” (IUCN, 2015).
584. J. E. Jiménez, M. Lucherini, A. J. Novaro, “*Pseudalopex fulvipes*. The IUCN Red List of Threatened Species. Version 2015.2” (IUCN, 2008).
585. B. D. Gerber, S. M. Karpanty, J. Randrianantenaina, Activity patterns of carnivores in the rain forests of Madagascar: implications for species coexistence. *Journal of Mammalogy*. **93**, 667–676 (2012).
586. Z. J. Farris *et al.*, When carnivores roam: temporal patterns and overlap among Madagascar's native and exotic carnivores. *Journal of Zoology*. **296**, 45–57 (2015).
587. A. Hawkins, “*Galidictis grandidieri*. The IUCN Red List of Threatened Species. Version 2015.2” (IUCN, 2008).
588. L. Woolaver, R. Nichols, W. F. Rakotombololona, A. T. Volahy, J. Durbin, Population status, distribution and conservation needs of the narrow-striped mongoose *Mungotictis decemlineata* of Madagascar. *Oryx*. **40**, 67–75 (2006).
589. G. Acosta, D. Cossios, M. Lucherini, L. Villalba, “*Leopardus jacobita*. The IUCN Red List of Threatened Species. Version 2015.2” (IUCN, 2008).
590. A. D. Cuarón, H. Helgen, “*Spilogale pygmaea*. The IUCN Red List of Threatened Species. Version 2014.3” (IUCN, 2008).
591. C. Kreuder *et al.*, Patterns of mortality in southern sea otters (*Enhydra lutris nereis*) from 1998–2001. *Journal of Wildlife Diseases*. **39**, 495–509 (2003).
592. C. K. Johnson *et al.*, Prey choice and habitat use drive sea otter pathogen exposure in a resource-limited coastal system. *Proceedings of the National Academy of Sciences*. **106**, 2242–2247 (2009).
593. P. A. Conrad *et al.*, Transmission of *Toxoplasma*: Clues from the study of sea otters as sentinels of *Toxoplasma gondii* flow into the marine environment. *International Journal for Parasitology*. **35**, 1155–1168 (2005).
594. G. Medina-Vogel, F. Boher, G. Flores, A. Santibañez, Spacing behavior of marine otters (*Lontra felina*) in relation to land refuges and fishery waste in central Chile. *Journal of Mammalogy*. **88**, 487–494 (2007).
595. J. C. Mangel *et al.*, Latitudinal variation in diet and patterns of human interaction in the marine otter. *Marine Mammal Science*. **27**, E14–E25 (2010).

596. B. D. Barnett, R. L. Rudd, Feral dogs of the Galapagos Islands: impact and control. *International Journal for the Study of Animal Problems*. **4**, 44–58 (1983).
597. A. D. Cuarón, M. A. Martínez-Morales, K. W. McFadden, D. Valenzuela, M. E. Gompper, The status of dwarf carnivores on Cozumel Island, Mexico. *Biodiversity and Conservation*. **13**, 317–331 (2004).
598. K. W. McFadden *et al.*, Vulnerable island carnivores: the endangered endemic dwarf procyonids from Cozumel Island. *Biodiversity and Conservation*. **19**, 491–502 (2009).
599. C. O. Loggers, M. Thévenot, S. Aulagnier, Status and distribution of Moroccan wild ungulates. *Biological Conservation*. **59**, 9–18 (1992).
600. R. C. Beudels, P. Devillers, R.-M. Lafontaine, J. Devillers-Terschuren, M.-O. Beudels, “Sahelo-Saharan Antelopes. Status and Perspectives. Report on the conservation status of the six Sahelo-Saharan Antelopes. CMS SSA Concerted Action. 2d edition. CMS Technical Series Publication N°10.” (UNEP/CMS Secretariat,, Bonn, 2005).
601. J. M. Smith-Flueck *et al.*, Advances in ecology and conservation of Hippocamelus species in South America. *Animal Production Science*. **51**, 378–383 (2013).
602. J. Jimenez *et al.*, “*Hippocamelus bisulcus*. The IUCN Red List of Threatened Species. Version 2015.2” (IUCN, 2008).
603. D. J. Lizcano, S. J. Alvarez, “*Mazama bricenii*. The IUCN Red List of Threatened Species. Version 2015.2” (IUCN, 2008).
604. D. J. Lizcano, S. J. Alvarez, “*Mazama rufina*. The IUCN Red List of Threatened Species. Version 2015.2” (IUCN, 2008).
605. J. Barrio, D. Tirira, “*Pudu mephistophiles*. The IUCN Red List of Threatened Species. Version 2015.2.” (IUCN, 2008).
606. M. Weber, S. Gonzalez, Latin American deer diversity and conservation: A review of status and distribution. *Ecoscience*. **10**, 443–454 (2003).
607. E. A. Silva-Rodríguez *et al.*, Evaluating mortality sources for the vulnerable pudu *Pudu puda* in Chile: implications for the conservation of a threatened deer. *Oryx*. **44**, 97–103 (2010).
608. E. A. Silva-Rodríguez, K. E. Sieving, Domestic dogs shape the landscape-scale distribution of a threatened forest ungulate. *Biological Conservation*. **150**, 103–110 (2012).
609. E. A. Silva-Rodríguez *et al.*, Priorities for the conservation of the pudu (*Pudu puda*) in southern South America. *Animal Production Science*. **51**, 375–377 (2013).
610. J. Jimenez, in *Neotropical cervidology Biology and medicine of Latin American Deer*, J. Duarte, S. Gonzalez, Eds. (Brazil, 2010), pp. 140–150.
611. J. Gerlach, S. Mickleburgh, A. M. Hutson, W. Bergmans, “*Coleura seychellensis*. The IUCN Red List of Threatened Species. Version 2015.2” (IUCN, 2008).
612. J. Gerlach, Conservation of the Seychelles sheath-tailed bat *Coleura seychellensis* from 1997–2011 and future prospects. *Phelsuma*. **19**, 54–68 (2011).
613. J. M. Palmeirim *et al.*, “Distribution, status, and conservation of bats in the Fiji islands” (University of the South Pacific, Fauna & Flora International, and University of Lisbon, Suva, 2005).
614. J. M. Palmeirim *et al.*, Distribution, status and conservation of the bats of the Fiji Islands. *Oryx*. **41**, 509–519 (2007).
615. J. C. Z. Woinarski, A. A. Burbidge, P. Harrison, *The action plan for Australian mammals 2012* (CSIRO Publishing, Melbourne, 2014).
616. B. D. Lloyd, Advances in New Zealand mammalogy 1990–2000: Short-tailed bats. *Journal of the Royal Society of New Zealand*. **31**, 59–81 (2001).
617. C. O'Donnell, J. E. Christie, R. A. Hitchmough, B. Lloyd, S. Parsons, The conservation status of New Zealand bats, 2009. *New Zealand Journal of Zoology*. **37**, 297–311 (2010).
618. C. O'Donnell, “*Mystacina tuberculata*. The IUCN Red List of Threatened Species. Version 2015.2” (IUCN, 2008).
619. J. Scrimgeour, A. Beath, M. Swanney, Cat predation of short-tailed bats (*Mystacina tuberculata rhyocobia*) in Rangataua Forest, Mount Ruapehu, Central North Island, New Zealand. *New Zealand Journal of Zoology*. **39**, 257–260 (2012).
620. J. Arroyo-Cabrales, B. Miller, F. Reid, A. D. Cuarón, P. C. de Grammont, “*Leptonycteris nivalis*. The IUCN Red List of Threatened Species. Version 2014.3” (IUCN, 2008).
621. C. R. Tidemann, H. D. Yorkston, A. J. Russack, The diet of cats, *Felis catus*, on Christmas Island, Indian Ocean. *Wildlife Research*. **21**, 279–286 (1994).
622. D. J. James, G. J. Dale, K. Retallick, K. Orchard, “Christmas Island flying-fox *Pteropus natalis* Thomas 1887: an assessment of conservation status and threats” (Director of National Parks, Canberra, 2007).

623. M. A. Pryde, C. F. J. O'Donnell, R. J. Barker, Factors influencing survival and long-term population viability of New Zealand long-tailed bats (*Chalinolobus tuberculatus*): Implications for conservation. *Biological Conservation*. **126**, 175–185 (2005).
624. C. O'Donnell, "*Chalinolobus tuberculatus*. The IUCN Red List of Threatened Species. Version 2015.2" (IUCN, 2008).
625. M. J. Daniel, G. R. Williams, A survey of the distribution, seasonal activity and roost sites of New Zealand bats. *New Zealand Journal of Ecology*. **7**, 9–25 (2005).
626. C. F. J. O'Donnell, Advances in New Zealand mammalogy 1990–2000: Long-tailed bat. *Journal of the Royal Society of New Zealand*. **31**, 43–57 (2001).
627. J. Arroyo-Cabrales, S. T. Álvarez-Castañeda, "*Myotis findleyi*. The IUCN Red List of Threatened Species. Version 2014.3" (IUCN, 2008).
628. J. Arroyo-Cabrales, S. T. Álvarez-Castañeda, "*Myotis vivesi*. The IUCN Red List of Threatened Species. Version 2014.3." (IUCN, 2008).
629. L. Lumsden, M. Schulz, R. Ashton, D. Middleton, "Investigation of threats to the Christmas Island pipistrelle" (Arthur Rylah Institute for Environmental Research, Heidelberg, 2007).
630. M. Oakwood, Reproduction and demography of the northern quoll, *Dasyurus hallucatus*, in the lowland savanna of northern Australia. *Australian Journal of Zoology*. **48**, 519–539 (2000).
631. A. B. Pollock, Notes on status, distribution and diet of northern quoll *Dasyurus hallucatus* in the Mackay-Bowen area, mideastern Queensland. *Australian Zoologist*. **31**, 388–395 (1999).
632. J. K. Webb, S. Legge, K. Tuft, T. Cremona, C. Austin, "Can we mitigate cane toad impacts on northern quolls? | Final report" (National Environmental Research Program, Northern Australia Hub. Charles Darwin University, Casuarina, 2015).
633. T. Leary *et al.*, "*Murexia rothschildi*. The IUCN Red List of Threatened Species. Version 2014.3" (IUCN, 2008).
634. J. C. Z. Woinarski *et al.*, The mammal fauna of the Sir Edward Pellew island group, Northern Territory, Australia: refuge and death-trap. *Wildlife Research*. **38**, 307–322 (2011).
635. J. C. Z. Woinarski, "National multi-species recovery plan for the Carpentarian antechinus *Pseudantechinus mimulus*, Butler's dunnart *Sminthopsis butleri* and northern hopping-mouse *Notomys aquilo*, 2004 - 2008" (Northern Territory Department of Infrastructure Planning and Environment, Darwin, 2004).
636. J. Gates, "Recovery plan for the Kangaroo Island dunnart *Sminthopsis aitkeni*" (Department of Environment and Natural Resources, South Australia, 2011).
637. P. D. Meek, B. Triggs, The food of foxes, dogs and cats on two peninsulas in Jervis Bay, New South Wales. *Proceedings of the Linnean Society of New South Wales*. **120**, 117–127 (1998).
638. A. W. Claridge, D. J. Mills, S. C. Barry, Prevalence of threatened native species in canid scats from coastal and near-coastal landscapes in south-eastern Australia. *Australian Mammalogy*. **32**, 117–126 (2010).
639. S. Churchill, "Recovery plan for the sandhill dunnart (*Sminthopsis psammophila*)" (Department of Environment and Heritage, Adelaide, 2001).
640. J. A. Friend, in *Australian ecosystems: 200 years of utilisation, degradation and reconstruction: proceedings of a symposium held Geraldton, Western Australia, August - September*, D. A. Saunders, A. Hopkins, R. A. How, Eds. (Chipping Norton, 1990), pp. 369–377.
641. J. A. Friend, N. D. Thomas, in *Reintroduction Biology of Australian and New Zealand Fauna*, M. Serena, Ed. (Surrey Beatty & Sons, Chipping Norton, 1994), pp. 189–198.
642. NSW National Parks and Wildlife Service, "Approved recovery plan for the mountain pygmy-possum" (NSW National Parks and Wildlife Service, Hurstville, 2002).
643. K. Watson, "Aspects of the history, home range and diet of the feral cat (*Felis catus*) in the Perisher Range resort area of Kosciuszko National Park, New South Wales", thesis, University of Sydney (2006).
644. K. Green, W. S. Osborne, The diet of foxes, *Vulpes Vulpes* (L.), in relation to abundance of prey above the winter snowline in New South Wales. *Wildlife Research*. **8**, 349–360 (1981).
645. D. F. Gibson *et al.*, Predation by feral cats, *Felis catus*, on the rufous hare-wallaby, *Lagorchestes hirsutus*, in the Tanami Desert. *Australian Mammalogy*. **17**, 103–107 (1994).
646. B. Hardman, "Reintroduction ecology of mala (*Lagorchestes hirsutus*) and merrnine (*Lagostrophus fasciatus*) at Shark Bay, Western Australia", thesis, Edith Cowan University, Joondalup (2010).

647. G. Lundie-Jenkins, L. K. Corbett, C. M. Phillips, Ecology of the Rufous Hare-wallaby, *Lagorchestes hirsutus* Gould (Marsupialia : Macropodidae), in the Tanami Desert, Northern Territory. III. Interactions with introduced mammal species. *Wildlife Research*. **20**, 495–511 (1993).
648. J. Short, J. E. Kinnear, A. Robley, Surplus killing by introduced predators in Australia—evidence for ineffective anti-predator adaptations in native prey species? *Biological Conservation*. **103**, 283–301 (2002).
649. K. D. Morris, in *Biodiversity and the re-introduction of native fauna at Uluru-Kata Tjuta National Park*, J. S. Gillen, R. Hamilton, W. A. Low, C. Creagh, Eds. (Kingston, 2000), pp. 64–74.
650. J. D. Richards, “Western barred bandicoot *Perameles bougainville*, burrowing bettong *Bettongia lesueur* and banded hare-wallaby *Lagostrophus fasciatus* national recovery plan” (Department of Environment and Conservation, Western Australia, 2012).
651. D. O. Fisher, S. P. Blomberg, S. D. Hoyle, Mechanisms of drought-induced population decline in an endangered wallaby. *Biological Conservation*. **102**, 107–115 (2001).
652. Department of Environment and Resource Management, “National recovery plan for the Proserpine rock-wallaby *Petrogale persephone*” (Queensland Department of Environment and Resource Management, Brisbane, 2010).
653. J. Short, S. D. Bradshaw, J. Giles, R. I. T. Prince, G. R. Wilson, Reintroduction of macropods (Marsupialia: Macropodoidea) in Australia—A review. *Biological Conservation*. **62**, 189–204 (1992).
654. P. J. de Tores, M. W. Hayward, M. J. Dillon, R. I. Brazell, Review of the distribution, causes for the decline and recommendations for management of the quokka, *Setonix brachyurus* (Macropodidae: Marsupialia), an endemic macropodid marsupial from south-west Western Australia. *Conservation Science Western Australia*. **6**, 13–73 (2007).
655. D. J. Dundas, P. J. Adams, P. A. Fleming, in *58th Scientific Meeting Australian Mammal Society, - September, Port Augusta, South Australia*. (2012).
656. M. Parsons, P. Latch, “Recovery plan for the mahogany glider *Petaurus gracilis*. Report to the Department of the Environment, Water, Heritage and the Arts, Canberra.” (Environmental Protection Agency, Brisbane, 2007).
657. R. Wheeler, D. Priddel, The impact of introduced predators on two threatened prey species: A case study from western New South Wales. *Ecological Management & Restoration*. **10**, S117–S123 (2009).
658. A. F. Wayne *et al.*, Sudden and rapid decline of the abundant marsupial *Bettongia penicillata* in Australia. *Oryx*. **49**, 175–185 (2013).
659. N. J. Marlow *et al.*, Cats (*Felis catus*) are more abundant and are the dominant predator of woylies (*Bettongia penicillata*) after sustained fox (*Vulpes vulpes*) control. *Australian Journal of Zoology*. **63**, 18–27 (2015).
660. J. E. Kinnear, N. R. Sumner, M. L. Onus, The red fox in Australia - an exotic predator turned biocontrol agent. *Biological Conservation*. **108**, 335–359 (2002).
661. N. D. Burrows, P. E. S. Christensen, Long-term trends in native mammal capture rates in a jarrah forest in south-western Australia. *Australian Forestry*. **65**, 211–219 (2002).
662. A. F. Wayne, G. L. Liddelow, M. R. Williams, Forestcheck: terrestrial vertebrate associations with fox control and silviculture in jarrah (*Eucalyptus marginata*) forest. *Australian Forestry*. **74**, 336–349 (2011).
663. N. J. Marlow, A. A. E. Williams, N. D. Thomas, B. Macmahon, J. Lawson, The diet of foxes (*Vulpes vulpes*) in fragmented Wheatbelt reserves in Western Australia: implications for woylies (*Bettongia penicillata*) and other native fauna. *Conservation Science Western Australia*. **9**, 239–248 (2015).
664. J. Courtenay, J. A. Friend, “Gilbert’s potoroo (*Potorous gilbertii*) recovery plan” (Department of Conservation and Land Management, Wanneroo, 2004).
665. NSW National Parks and Wildlife Service, “Approved recovery plan for the long-footed potoroo (*Potorous longipes*)” (NSW National Parks and Wildlife Service, Hurstville, 2002).
666. D. Nunan, S. Henry, P. Tennant, “Long-footed potoroo (*Potorous longipes*) recovery plan” (Department of the Environment and Heritage, Canberra, 2000).
667. G. W. Brown, B. E. Triggs, Diets of wild canids and foxes in East Gippsland 1983-1987, using predator scat analysis. *Australian Mammalogy*. **13**, 209–213 (1990).
668. A. F. Wayne, J. F. Rooney, C. G. Ward, C. V. Vellios, D. B. Lindenmayer, The life history of *Pseudocheirus occidentalis* (Pseudocheiridae) in the jarrah forest of south-western Australia. *Australian Journal of Zoology*. **53**, 325–337 (2005).
669. B. A. Jones, R. A. How, D. J. Kitchener, A field study of *Pseudocheirus occidentalis* (Marsupialia: Petauridae) II. Population studies. *Wildlife Research*. **21**, 189–201 (1994).

670. P. de Tores, M. W. Hayward, S. Rosier, The western ringtail possum, *Pseudocheirus occidentalis*, and the quokka, *Setonix brachyurus*, case studies: Western Shield review-February 2003. *Conservation Science Western Australia*. **5**, 235–257 (2004).
671. A. F. Wayne *et al.*, The abundance of a threatened arboreal marsupial in relation to anthropogenic disturbances at local and landscape scales in Mediterranean-type forests in south-western Australia. *Biological Conservation*. **127**, 463–476 (2006).
672. S. Turvey, K. Helgen, “*Nesophontes edithae*. The IUCN Red List of Threatened Species. Version 2014.3” (IUCN, 2008).
673. S. Turvey, K. Helgen, “*Nesophontes hypomicrus*. The IUCN Red List of Threatened Species. Version 2014.3” (IUCN, 2008).
674. S. Turvey, K. Helgen, “*Nesophontes major*. The IUCN Red List of Threatened Species. Version 2014.3” (IUCN, 2008).
675. S. Turvey, K. Helgen, “*Nesophontes micrus*. The IUCN Red List of Threatened Species. Version 2014.3” (IUCN, 2008).
676. S. Turvey, K. Helgen, “*Nesophontes paramicrus*. The IUCN Red List of Threatened Species. Version 2014.3” (IUCN, 2008).
677. S. Turvey, K. Helgen, “*Nesophontes zamicus*. The IUCN Red List of Threatened Species. Version 2014.3” (IUCN, 2008).
678. J. Soy, C. A. Mancina, “*Solenodon cubanus*. The IUCN Red List of Threatened Species. Version 2014.3” (IUCN, 2008).
679. R. Borroto-Páez, Invasive mammals in Cuba: an overview. *Biological Invasions*. **11**, 2279–2290 (2009).
680. S. Turvey, K. Helgen, “*Solenodon marcanoi*. The IUCN Red List of Threatened Species. Version 2014.3” (IUCN, 2008).
681. S. Turvey, S. Inchaustegui, “*Solenodon paradoxus*. The IUCN Red List of Threatened Species. Version 2014.3” (IUCN, 2008).
682. C. A. Woods, J. A. Ottenwalder, “The natural history of southern Haiti” (Department of Natural Sciences, Florida Museum of Natural History, University of Florida., Gainesville, 1992).
683. S. T. Turvey, H. M. R. Meredith, R. P. Scofield, Continued survival of Hispaniolan solenodon *Solenodon paradoxus* in Haiti. *Oryx*. **42**, 611–614 (2008).
684. S. T. Turvey *et al.*, Is local ecological knowledge a useful conservation tool for small mammals in a Caribbean multicultural landscape? *Biological Conservation*. **169**, 189–197 (2014).
685. R. Hutterer, “*Crocidura canariensis*. The IUCN Red List of Threatened Species. Version 2015.2” (IUCN, 2008).
686. M. Motokawa, H. Abe, “*Crocidura orii*. The IUCN Red List of Threatened Species. Version 2015.2” (IUCN, 2008).
687. F. Yamada, in *Turning the tide: the eradication of invasive species*, C. R. Veitch, M. N. Clout, Eds. (IUCN SSC Invasive Species Specialist Group. IUCN, Gland, 2002), pp. 389–392.
688. M. Schulz, “National recovery plan for the Christmas Island shrew *Crocidura attenuata trichura*” (Department of the Environment and Heritage, Canberra, 2004).
689. P. D. Meek, The decline and current status of the Christmas Island shrew *Crocidura attenuata trichura* on Christmas Island, Indian Ocean. *Australian Mammalogy*. **22**, 43–49 (2013).
690. M. Fernandes, J. Herrero, S. Aulagnier, G. Amori, “*Galemys pyrenaicus*. The IUCN Red List of Threatened Species. Version 2015.2” (IUCN, 2008).
691. K. Kauhala, Introduced carnivores in Europe with special reference to central and northern Europe. *Wildlife Biology*. **2**, 197–204 (1996).
692. F. M. Angelici, E. Randi, F. Riga, V. Trocchi, “*Lepus corsicanus*. The IUCN Red List of Threatened Species. Version 2015.2” (IUCN, 2008).
693. K. Sugimura *et al.*, Distribution and abundance of the Amami rabbit *Pentalagus furnessi* in the Amami and Tokuno Islands, Japan. *Oryx*. **34**, 198–206 (2000).
694. K. Shionosaki, F. Yamada, T. Ishikawa, S. Shibata, Feral cat diet and predation on endangered endemic mammals on a biodiversity hot spot (Amami-Oshima Island, Japan). *Wildlife Research*. **42**, 343–352 (2015).
695. Y. Watari, Y. Nagai, F. Yamada, T. Sakoda, The diet of dogs in the Amami-Oshima Island forest, with special attention to predation on endangered animals. *Japanese Journal of Conservation Ecology*. **12**, 28–35 (2007).
696. F. Yamada, K. Sugimura, Negative impact of an invasive small Indian mongoose *Herpestes javanicus* on native wildlife species and evaluation of a control project in Amami-Oshima and Okinawa Islands, Japan. *Global Environmental Research*. **8**, 117–124 (2004).
697. Y. Watari, S. Takatsuki, T. Miyashita, Effects of exotic mongoose (*Herpestes javanicus*) on the native fauna of Amami-Oshima Island, southern Japan, estimated by distribution patterns along the historical gradient of mongoose invasion. *Biological Invasions*. **10**, 7–17 (2007).



698. Y. Watari *et al.*, Evaluating the “recovery level” of endangered species without prior information before alien invasion. *Ecology and Evolution*. **3**, 4711–4721 (2013).
699. F. A. Cervantes, *Sylvilagus graysoni*. *Mammalian Species*. **559**, 1–3 (1997).
700. Mexican Association for Conservation and Study of Lagomorphs, H. Rangel Cordero, F. J. Romero Malpica, “*Sylvilagus graysoni*. The IUCN Red List of Threatened Species. Version 2014.3” (IUCN, 2008).
701. C. Lorenzo, S. T. Álvarez-Castañeda, J. Vazquez, Conservation status of the threatened, insular San Jose brush rabbit (*Sylvilagus mansuetus*). *Western North American Naturalist*. **71**, 10–16 (2011).
702. C. V. Espinosa-Gayosso, S. T. Álvarez-Castañeda, Status of *Dipodomys insularis*, an endemic species of San Jose Island, Gulf of California, Mexico. *Journal of Mammalogy*. **87**, 677–682 (2006).
703. C. Lorenzo, S. T. Álvarez-Castañeda, “*Sylvilagus mansuetus*. The IUCN Red List of Threatened Species 2011: e.T21210A9257211” (IUCN, 2011).
704. C. D. FitzGibbon, The distribution and abundance of the golden-rumped elephant-shrew *Rhynchocyon chrysopygus* in Kenyan coastal forests. *Biological Conservation*. **67**, 153–160 (1994).
705. K. D. Morris, in *Turning the tide: the eradication of invasive Species*, C. R. Veitch, M. N. Clout, Eds. (IUCN SSC Invasive Species Specialist Group. IUCN, Gland, 2002), pp. 219–225.
706. C. Palmer, R. Taylor, A. A. Burbidge, “Recovery plan for the golden bandicoot (*Isodon auratus*) and golden-backed tree-rat (*Mesembriomys macrurus*) 2004 - 2009” (Northern Territory Department of Infrastructure Planning and Environment, Darwin, 2003).
707. P. D. Montague, 35. A report on the fauna of the Monte Bello Islands. *Proceedings of the Zoological Society of London*. **84**, 625–652 (1914).
708. J. D. Richards, J. Short, Reintroduction and establishment of the western barred bandicoot *Perameles bougainville* (Marsupialia: Peramelidae) at Shark Bay, Western Australia. *Biological Conservation*. **109**, 181–195 (2003).
709. T. Friend, J. Richards, “*Perameles bougainville*. The IUCN Red List of Threatened Species 2008: e.T16569A6092834” (IUCN, 2008).
710. T. Leary *et al.*, “*Rhynchomeles prattorum*. The IUCN Red List of Threatened Species. Version 2015.2” (IUCN, 2008).
711. R. Paltridge, The diets of cats, foxes and dingoes in relation to prey availability in the Tanami Desert, Northern Territory. *Wildlife Research*. **29**, 389–403 (2002).
712. K. E. Moseby *et al.*, Predation determines the outcome of 10 reintroduction attempts in arid South Australia. *Biological Conservation*. **144**, 2863–2872 (2011).
713. M. Rich, B. Nolan, M. Gentle, J. Speed, in *16th Australasian Vertebrate Pest Conference*, M. Gentle, Ed. (Brisbane, 2014), p. 43.
714. K. E. Moseby, D. E. Peacock, J. L. Read, Catastrophic cat predation: A call for predator profiling in wildlife protection programs. *Biological Conservation*. **191**, 331–340 (2015).
715. R. I. Southgate, in *Reintroduction Biology of Australian and New Zealand Fauna*, M. Serena, Ed. (Surrey Beatty & Sons, Chipping Norton, 1994), pp. 165–170.
716. R. Medhi, D. Chetry, P. C. Bhattacharjee, B. N. Patiri, Status of *Trachypithecus geei* in a rubber plantation in Western Assam, India. *International Journal of Primatology*. **25**, 1331–1337 (2004).
717. S. Molur *et al.*, “Status of South Asian Primates: Conservation Assessment and Management Plan (C.A.M.P.) Workshop Report, 2003” (Zoo Outreach Organisation / CBSG-South Asia, Coimbatore, 2003).
718. R. H. Horwich, R. Das, A. Bose, Conservation and the current status of the golden langur in Assam, India, with reference to Bhutan. *Primate Conservation*. **27**, 77–83 (2013).
719. A. Baden *et al.*, “*Microcebus ravelobensis*. The IUCN Red List of Threatened Species. Version 2015.2.” (IUCN, 2014).
720. D. K. Brockman, L. R. Godfrey, L. J. Dollar, J. Ratsirarson, Evidence of invasive *Felis silvestris* predation on *Propithecus verreauxi* at Beza Mahafaly Special Reserve, Madagascar. *International Journal of Primatology*. **29**, 135–152 (2008).
721. L. M. Veiga *et al.*, “*Callicebus barbarabrownae*. The IUCN Red List of Threatened Species. Version 2015.2.” (IUCN, 2008).
722. L. M. Veiga *et al.*, “*Callicebus coimbrai*. The IUCN Red List of Threatened Species. Version 2015.2” (IUCN, 2008).
723. M. Shekelle, A. Salim, S. Merker, “*Tarsius dentatus*. The IUCN Red List of Threatened Species. Version 2015.2” (IUCN, 2008).
724. M. Shekelle, A. Salim, C. P. Groves, M. Indrawan, “*Tarsius pelengensis*. The IUCN Red List of Threatened Species. Version

- 2015.2" (IUCN, 2008).
725. M. Shekelle, A. Salim, "*Tarsius tarsier*. The IUCN Red List of Threatened Species. Version 2015.2" (IUCN, 2008).
726. S. Turvey, L. Davalos, "*Geocapromys brownii*. The IUCN Red List of Threatened Species. Version 2015.2" (IUCN, 2008).
727. G. C. Clough, Current status of two endangered Caribbean rodents. *Biological Conservation*. **10**, 43–47 (1976).
728. S. Turvey, K. Helgen, "*Geocapromys columbianus*. The IUCN Red List of Threatened Species. Version 2015.2" (IUCN, 2008).
729. S. Turvey, K. Helgen, "*Isolobodon montanus*. The IUCN Red List of Threatened Species. Version 2015.2" (IUCN, 2008).
730. S. Turvey, L. Davalos, "*Isolobodon portoricensis*. The IUCN Red List of Threatened Species. Version 2015.2" (IUCN, 2008).
731. J. Soy, G. Silva, "*Mesocapromys angelcabrerai*. The IUCN Red List of Threatened Species. Version 2015.2" (IUCN, 2008).
732. J. Soy, G. Silva, "*Mesocapromys auritus*. The IUCN Red List of Threatened Species. Version 2015.2" (IUCN, 2008).
733. J. Soy, G. Silva, "*Mesocapromys nanus*. The IUCN Red List of Threatened Species. Version 2015.2" (IUCN, 2008).
734. J. Soy, G. Silva, "*Mesocapromys sanfelipensis*. The IUCN Red List of Threatened Species. Version 2015.2" (IUCN, 2008).
735. V. B. Alvarez, A. C. González, The critical condition of hutias in Cuba. *Oryx*. **25**, 206–208 (1991).
736. J. Soy, R. Borroto, G. Silva, "*Mysateles meridionalis*. The IUCN Red List of Threatened Species. Version 2015.2" (IUCN, 2008).
737. S. Turvey, S. Inchaustegui, "*Plagiodontia aedium*. The IUCN Red List of Threatened Species. Version 2015.2" (IUCN, 2008).
738. R. C. Dowler, D. S. Carroll, C. W. Edwards, Rediscovery of rodents (Genus *Nesoryzomys*) considered extinct in the Galápagos Islands. *Oryx*. **34**, 109–118 (2000).
739. D. Tirira, C. Boada, M. Weksler, "*Aegialomys galapagoensis*. The IUCN Red List of Threatened Species. Version 2015.2" (IUCN, 2008).
740. P. Rigaux, M. Vaslin, J. F. Noblet, G. Amori, L. J. Palomo, "*Arvicola sapidus*. The IUCN Red List of Threatened Species. Version 2015.2" (IUCN, 2008).
741. I. Mate, J. Barrull, J. Gosálbez, J. Ruiz-Olmo, M. Salicrú, The role of the southern water vole *Arvicola sapidus* in the diet of predators: a review. *Mammal Review*. **45**, 30–40 (2015).
742. P. García-Díaz, V. Arévalo, R. Vicente, M. Lizana, The impact of the American mink (*Neovison vison*) on native vertebrates in mountainous streams in central Spain. *European Journal of Wildlife Research*. **59**, 823–831 (2013).
743. S. Turvey, K. Helgen, "*Megalomys desmarestii*. The IUCN Red List of Threatened Species. Version 2015.2" (IUCN, 2008).
744. S. Turvey, K. Helgen, "*Megalomys luciae*. The IUCN Red List of Threatened Species. Version 2015.2" (IUCN, 2008).
745. P. Cortés-Calva, S. T. Álvarez-Castañeda, E. Yensen, *Neotoma anthonyi*. *Mammalian Species*. **663**, 1–3 (2001).
746. S. T. Álvarez-Castañeda, E. Yensen, *Neotoma bryanti*. *Mammalian Species*, 3 (1999).
747. F. A. Smith, B. T. Bestelmeyer, J. Biardi, M. Strong, Anthropogenic extinction of the endemic woodrat, *Neotoma bunkerii* Burt. *Biodiversity Letters*. **1**, 149–155 (1993).
748. S. T. Álvarez-Castañeda, A. Ortega-Rubio, Current status of rodents on islands in the Gulf of California. *Biological Conservation*. **109**, 157–163 (2003).
749. P. Cortés-Calva, E. Yensen, S. T. Álvarez-Castañeda, *Neotoma martinensis*. *Mammalian Species*. **657**, 1–3 (2001).
750. D. Tirira, R. Dowler, C. Boada, M. Weksler, "*Nesoryzomys darwini*. The IUCN Red List of Threatened Species. Version 2015.2" (IUCN, 2008).
751. D. Tirira, R. Dowler, C. Boada, M. Weksler, "*Nesoryzomys indefessus*. The IUCN Red List of Threatened Species. Version 2015.2" (IUCN, 2008).
752. D. B. Harris, S. D. Gregory, D. W. Macdonald, Space invaders? A search for patterns underlying the coexistence of alien black rats and Galápagos rice rats. *Oecologia*. **149**, 276–288 (2006).
753. D. B. Harris, D. W. Macdonald, Interference competition between introduced black rats and endemic Galápagos rice rats. *Ecology*. **88**, 2330–2344 (2007).
754. S. D. Gregory, D. W. Macdonald, Prickly coexistence or blunt competition? *Opuntia* refugia in an invaded rodent community. *Oecologia*. **159**, 225–236 (2008).
755. S. Turvey, L. Davalos, "*Oligoryzomys victus*. The IUCN Red List of Threatened Species. Version 2015.2" (IUCN, 2008).
756. S. Turvey, K. Helgen, "*Oryzomys antillarum*. The IUCN Red List of Threatened Species. Version 2015.2" (IUCN, 2008).

757. J. Ochoa, M. Gomez-Laverde, M. Weksler, R. Timm, “*Oryzomys gorgasi*. The IUCN Red List of Threatened Species. Version 2015.2” (IUCN, 2008).
758. S. T. Álvarez-Castañeda, L. Méndez, *Oryzomys nelsoni*. *Mammalian Species*. **735**, 1–2 (2003).
759. S. T. Turvey, M. Weksler, E. L. Morris, M. Norkert, Taxonomy, phylogeny, and diversity of the extinct lesser Antillean rice rats (Sigmodontinae: Oryzomyini), with description of a new genus and species. *Zoological Journal of the Linnean Society*. **160**, 748–772 (2010).
760. S. T. Álvarez-Castañeda, P. Cortés-Calva, *Peromyscus caniceps*. *Mammalian Species*. **602**, 1–2 (1998).
761. E. Mellink, G. Ceballos, J. Luévano, Population demise and extinction threat of the Angel de la Guarda deer mouse (*Peromyscus guardia*). *Biological Conservation*. **108**, 107–111 (2002).
762. E. Vázquez-Domínguez, G. Ceballos, J. Cruzado, Extirpation of an insular subspecies by a single introduced cat: the case of the endemic deer mouse *Peromyscus guardia* on Estanque Island, Mexico. *Oryx*. **38**, 347–350 (2004).
763. S. T. Álvarez-Castañeda, I. Castro-Arellano, T. Lacher, E. Vazquez, “*Peromyscus interparietalis*. The IUCN Red List of Threatened Species. Version 2015.2.” (IUCN, 2008).
764. S. T. Álvarez-Castañeda, *Peromyscus pseudocrinitus*. *Mammalian Species*. **601**, 1–3 (1998).
765. S. T. Álvarez-Castañeda, I. Castro-Arellano, T. Lacher, E. Vazquez, “*Peromyscus pseudocrinitus*. The IUCN Red List of Threatened Species. Version 2015.2.” (IUCN, 2008).
766. S. T. Álvarez-Castañeda, *Peromyscus sejugis*. *Mammalian Species*. **658**, 1–2 (2001).
767. S. T. Álvarez-Castañeda, I. Castro-Arellano, “*Peromyscus sejugis*. The IUCN Red List of Threatened Species. Version 2015.2” (IUCN, 2008).
768. J. O. Whitaker Jr, NatureServe, “*Reithrodontomys raviventris*. The IUCN Red List of Threatened Species. Version 2015.2” (IUCN, 2008).
769. A. M. MECKSTROTH, A. K. Miles, S. CHANDRA, Diets of introduced predators using stable isotopes and stomach contents. *Journal of Wildlife Management*. **71**, 2387–2392 (2007).
770. A. D. Cuarón, E. Vazquez, P. C. de Grammont, “*Reithrodontomys spectabilis*. The IUCN Red List of Threatened Species. Version 2015.2” (IUCN, 2008).
771. S. Turvey, K. Helgen, “*Boromys offella*. The IUCN Red List of Threatened Species. Version 2015.2” (IUCN, 2008).
772. S. Turvey, K. Helgen, “*Boromys torrei*. The IUCN Red List of Threatened Species. Version 2015.2” (IUCN, 2008).
773. S. Turvey, K. Helgen, “*Brotomys voratus*. The IUCN Red List of Threatened Species. Version 2015.2” (IUCN, 2008).
774. S. T. Turvey, J. R. Oliver, Y. M. Narganes Storde, P. Rye, Late Holocene extinction of Puerto Rican native land mammals. *Biology Letters*. **3**, 193–196 (2007).
775. Y. Leite, B. Patterson, “*Phyllomys thomasi*. The IUCN Red List of Threatened Species. Version 2015.2” (IUCN, 2008).
776. C. V. Espinosa-Gayosso, S. T. Álvarez-Castañeda, Status of *Dipodomys insularis*, an endemic species of San José Island, Gulf of California, Mexico. *Journal of Mammalogy*. **87**, 677–682 (2006).
777. S. T. Álvarez-Castañeda, I. Castro-Arellano, T. Lacher, E. Vazquez, J. Arroyo-Cabrales, “*Dipodomys margaritae*. The IUCN Red List of Threatened Species. Version 2015.2.” (IUCN, 2008).
778. L. Ruedas, D. Lunde, G. Musser, “*Bunomys coelestis*. The IUCN Red List of Threatened Species. Version 2015.2” (IUCN, 2008).
779. Y. Kaneko, N. Ishii, “*Diplothrix legata*. The IUCN Red List of Threatened Species. Version 2015.2” (IUCN, 2008).
780. E. Bonnaud *et al.*, The diet of feral cats on islands: a review and a call for more studies. *Biological Invasions*. **13**, 581–603 (2011).
781. K. Fukasawa, T. Miyashita, T. Hashimoto, M. Tatara, S. Abe, Differential population responses of native and alien rodents to an invasive predator, habitat alteration and plant masting. *Proceedings of the Royal Society B: Biological Sciences*. **280**, 20132075–20132075 (2013).
782. K. Aplin, K. Helgen, G. Musser, “*Komodomys rintjanus*. The IUCN Red List of Threatened Species. Version 2015.2” (IUCN, 2008).
783. P. Copley, Natural histories of Australia’s stick-nest rats, genus *Leporillus* (Rodentia : Muridae). *Wildlife Research*. **26**, 513–528 (1999).
784. T. Flannery *et al.*, “*Mallomys gunung*. The IUCN Red List of Threatened Species. Version 2015.2.” (IUCN, 2008).

785. K. Aplin, K. Helgen, “*Melomys aereus*. The IUCN Red List of Threatened Species. Version 2015.2” (IUCN, 2008).
786. K. Helgen, R. Singadan, D. Wright, A. Allison, K. Aplin, “*Melomys bannisteri*. The IUCN Red List of Threatened Species. Version 2015.2” (IUCN, 2008).
787. K. Helgen, K. Aplin, “*Melomys fraterculus*. The IUCN Red List of Threatened Species. Version 2015.2” (IUCN, 2008).
788. S. Molur *et al.*, “Status of South Asian Non-volant Small Mammals: Conservation Assessment and Management Plan (C.A.M.P.) Workshop Report” (Zoo Outreach Organisation / CBSG-South Asia, Coimbatore, 2005).
789. K. Helgen *et al.*, “*Nesoromys ceramicus*. The IUCN Red List of Threatened Species. Version 2015.2” (IUCN, 2008).
790. C. E. Gordon, A. Feit, J. Gruber, M. Letnic, Mesopredator suppression by an apex predator alleviates the risk of predation perceived by small prey. *Proceedings of the Royal Society B: Biological Sciences*. **282**, 20142870–20142870 (2015).
791. M. Letnic, M. S. Crowther, F. Koch, Does a top-predator provide an endangered rodent with refuge from an invasive mesopredator? *Animal Conservation*. **12**, 302–312 (2009).
792. M. Letnic, S. A. Dworjany, Does a top predator reduce the predatory impact of an invasive mesopredator on an endangered rodent? *Ecography*. **34**, 827–835 (2011).
793. J. L. Read, R. Cunningham, Relative impacts of cattle grazing and feral animals on an Australian arid zone reptile and small mammal assemblage. *Austral Ecology*. **35**, 314–324 (2010).
794. C. R. Pavey, J. R. Cole, P. J. McDonald, C. E. M. Nano, Population dynamics and spatial ecology of a declining desert rodent, *Pseudomys australis*: the importance of refuges for persistence. *Journal of Mammalogy*. **95**, 615–625 (2014).
795. C. R. Pavey, S. R. Eldridge, M. Heywood, Population dynamics and prey selection of native and introduced predators during a rodent outbreak in arid Australia. *Journal of Mammalogy*. **89**, 674–683 (2008).
796. P. Menkhorst, C. R. Dickman, M. Denny, K. Aplin, D. Lunney, “*Pseudomys fumeus*. The IUCN Red List of Threatened Species 2008: e.T18550A8423744.” (IUCN, 2008).
797. N. E. Davis *et al.*, Interspecific and geographic variation in the diets of sympatric carnivores: dingoes/wild dogs and red foxes in south-eastern Australia. *PLOS ONE* (2015), doi:10.1371/journal.pone.0120975.
798. K. Aplin, K. Helgen, “*Rattus hainaldi*. The IUCN Red List of Threatened Species. Version 2015.2” (IUCN, 2008).
799. K. Aplin, G. Musser, D. Lunde, “*Rattus lugens*. The IUCN Red List of Threatened Species. Version 2015.2” (IUCN, 2008).
800. K. B. Wyatt *et al.*, Historical mammal extinction on Christmas Island (Indian Ocean) correlates with introduced infectious disease. *PLOS ONE*. **3**, e3602–9 (2008).
801. P. O. Nameer, S. Molur, “*Rattus ranjinae*. The IUCN Red List of Threatened Species. Version 2015.2” (IUCN, 2008).
802. K. Aplin, D. Lunde, G. Musser, “*Rattus simalurensis*. The IUCN Red List of Threatened Species. Version 2015.2” (IUCN, 2008).
803. T. Leary *et al.*, “*Rattus vandeuseni*. The IUCN Red List of Threatened Species. Version 2014.3” (IUCN, 2008).
804. P. Pikacha, “Distribution, habitat preference, and conservation status of the endemic giant rats *Solomys ponceleti* and *S. salebrosus* on Choiseul Island, Solomon Islands. BP Conservation 2005 Final Report, Project no 700305” (Conservation International, Honiara, 2008).
805. T. Leary *et al.*, “*Solomys salebrosus*. The IUCN Red List of Threatened Species. Version 2014.3” (IUCN, 2008).
806. F. Yamada, N. Kawauchi, K. Nakata, S. Abe, N. Kotaka, Rediscovery after thirty years since the last capture of the critically endangered Okinawa spiny rat *Tokudaia muenninki* in the northern part of Okinawa Island. *Mammal Study*. **35**, 243–255 (2010).
807. N. Ishii, Y. Kaneko, “*Tokudaia osimensis*. The IUCN Red List of Threatened Species. Version 2015.2” (IUCN, 2008).
808. Y. Kaneko, “*Tokudaia tokunoshimensis*. The IUCN Red List of Threatened Species. Version 2015.2” (IUCN, 2008).
809. T. Leary *et al.*, “*Uromys imperator*. The IUCN Red List of Threatened Species. Version 2014.3” (IUCN, 2008).
810. T. Leary *et al.*, “*Uromys porculus*. The IUCN Red List of Threatened Species. Version 2014.3” (IUCN, 2008).
811. L. W. Traill *et al.*, Managing for change: wetland transitions under sea-level rise and outcomes for threatened species. *Diversity and Distributions*. **17**, 1225–1233 (2011).
812. Department of the Environment and Resource Management, “National recovery plan for the water mouse (false water rat) *Xeromys myoides*” (Queensland Department of the Environment and Resource Management, Brisbane, 2010).
813. J. Cole, “Recovery plan for the central rock-rat *Zygomys pedunculatus*” (Parks and Wildlife Commission of the Northern Territory, Alice Springs, 1999).

814. P. J. McDonald, R. Brittingham, C. Nano, R. Paltridge, A new population of the critically endangered central rock-rat (*Zyromys pedunculatus*) discovered in the Northern Territory. *Australian Mammalogy*. **37**, 97–100 (2015).
815. S. Goodman, D. Rakotondravony, “*Brachytarsomys villosa*. The IUCN Red List of Threatened Species. Version 2015.2” (IUCN).
816. S. Goodman, M. Raheisehena, “*Eliurus penicillatus*. The IUCN Red List of Threatened Species. Version 2015.2” (IUCN, 2008).
817. S. Goodman, D. Rakotondravony, “*Eliurus petteri*. The IUCN Red List of Threatened Species. Version 2015.2” (IUCN, 2008).
818. R. P. Young *et al.*, A baseline estimate of population size for monitoring the endangered Madagascar giant jumping rat *Hypogeomys antimena*. *Oryx*. **42**, 584–591 (2008).
819. S. Sommer, A. Toto Volahy, U. S. Seal, A population and habitat viability assessment for the highly endangered giant jumping rat (*Hypogeomys antimena*), the largest extant endemic rodent of Madagascar. *Animal Conservation*. **5**, 263–273 (2006).
820. S. Goodman, D. Rakotondravony, L. Dollar, “*Macrotarsomys ingens*. The IUCN Red List of Threatened Species. Version 2015.2” (IUCN, 2008).
821. C. Lowrey, A. V. Lizney, NatureServe, “*Tamias palmeri*. The IUCN Red List of Threatened Species. Version 2015.2” (IUCN, 2008).
822. P. Ponce-Campos, J. Thorbjarnarson, A. Velasco, “*Crocodylus acutus*. The IUCN Red List of Threatened Species. Version 2015.2.” (IUCN, 2012).
823. M. R. Bezuijen, P. Hartoyo, M. Elliott, B. A. Baker, “Project Tomistoma: second report on the ecology of the false gharial (*Tomistoma schlegelii*) in Sumatera” (Wildlife Management International Pty. Limited, Darwin, 1997).
824. M. R. Bezuijen, B. Shwedick, B. K. Simpson, A. Staniewicz, R. Stuebing, “*Tomistoma schlegelii*. The IUCN Red List of Threatened Species. Version 2015.2.” (IUCN, 2014).
825. R. Powell, R. W. Henderson, The taxonomic and conservation status of giant Hispaniolan *Clestus* (Anguidae). *Caribbean Journal of Science*. **39**, 237–240 (2003).
826. R. Powell, J. A. Ottenwalder, S. J. Inchaustegui, R. W. Henderson, R. E. Glor, Amphibians and reptiles of the Dominican Republic: species of special concern. *Oryx*. **34**, 118–128 (2000).
827. World Conservation Monitoring Centre, “*Celestus occiduus*. The IUCN Red List of Threatened Species. Version 2015.2” (IUCN, 1996).
828. P. J. Tolson, Critical habitat, predator pressures, and the management of *Epicrates monensis* (Serpentes: Boidae) on the Puerto Rico Bank: a multivariate analysis. *Forest Service General Technical Report (US Department of Agriculture)*. **RM-166**, 228–238 (1988).
829. P. J. Tolson, “*Chilabothrus monensis*. The IUCN Red List of Threatened Species. Version 2015.2” (IUCN, 1996).
830. R. A. Mittermeier, Jamaica's endangered species. *Oryx*. **11**, 258–262 (1972).
831. S. B. Hedges, R. Powell, “*Anolis longiceps*. The IUCN Red List of Threatened Species. Version 2015.2” (IUCN, 2010).
832. K. de Queiroz, G. C. Mayer, “*Anolis pogus*. The IUCN Red List of Threatened Species. Version 2015.2” (IUCN, 2013).
833. A. H. Whitaker, R. A. Sadlier, A. M. Bauer, V. A. Whitaker, “Biodiversity and conservation status of lizards in dry forest remnants in Province Sud, New Caledonia. Unpublished report by Whitaker Consultants Limited to Direction des Ressources Naturelles, Province Sud, Nouméa” (Whitaker Consultants Limited, Orinoco, 2005).
834. A. M. Bauer, T. Jackman, R. A. Sadlier, A. H. Whitaker, Review and phylogeny of the New Caledonian diplodactylid gekkotan genus *Eurydactylodes* Wermuth, 1965, with the description of a new species. *Zoologia Neocaledonica* **7**, *Mémoires du Muséum National d'Histoire Naturelle*. **198**, 13–36 (2014).
835. A. H. Whitaker, R. A. Sadlier, “*Eurydactylodes occidentalis*. The IUCN Red List of Threatened Species. Version 2014.3” (IUCN, 2013).
836. A. H. Whitaker, R. A. Sadlier, A. M. Bauer, “*Eurydactylodes symmetricus*. The IUCN Red List of Threatened Species. Version 2014.3” (IUCN, 2010).
837. A. H. Whitaker, R. A. Sadlier, “*Rhacodactylus ciliatus*. The IUCN Red List of Threatened Species. Version 2014.3” (IUCN, 2013).
838. A. H. Whitaker, R. A. Sadlier, “*Rhacodactylus sarasinorum*. The IUCN Red List of Threatened Species. Version 2014.3” (IUCN, 2013).

839. A. H. Whitaker, R. A. Sadler, "*Caledoniscincus chazeaui*. The IUCN Red List of Threatened Species. Version 2014.3" (IUCN, 2013).
840. J. C. Daltry *et al.*, Five years of conserving the 'world's rarest snake', the Antiguan racer *Alsophis antiguae*. *Oryx*. **35**, 119–127 (2001).
841. J. C. Daltry, Control of the black rat *Rattus rattus* for the conservation of the Antiguan racer *Alsophis antiguae* on Great Bird Island, Antigua. *Conservation Evidence*. **3**, 28–29 (2006).
842. J. C. Daltry, The effect of black rat *Rattus rattus* control on the population of the Antiguan racer snake *Alsophis antiguae* on Great Bird Island, Antigua. *Conservation Evidence*. **3**, 30–32 (2006).
843. R. A. Sajdak, R. W. Henderson, Status of West Indian racers in the Lesser Antilles. *Oryx*. **25**, 33–38 (1991).
844. M. Day, "*Alsophis rufiventris*. The IUCN Red List of Threatened Species. Version 2015.2." (IUCN, 1996).
845. R. W. Henderson, Consequences of predator introductions and habitat destruction on amphibians and reptiles in the post-Columbus West Indies. *Caribbean Journal of Science*. **28**, 1–10 (1992).
846. W. S. Hays, S. Conant, Biology and impacts of Pacific Island invasive species. 1. A worldwide review of effects of the small Indian mongoose, *Herpestes javanicus* (Carnivora: Herpestidae). *Pacific Science*. **61**, 3–16 (2007).
847. A. Allison, A. Hamilton, O. Tallowin, "*Emoia tuitarere*. The IUCN Red List of Threatened Species. Version 2014.3" (IUCN, 2013).
848. H. Ota, "*Goniurosaurus kuroiwae*. The IUCN Red List of Threatened Species. Version 2015.2" (IUCN, 2010).
849. Y. Nakamura, A. Takahashi, H. Ota, Recent cryptic extinction of squamate reptiles on Yoronjima Island of the Ryukyu Archipelago, Japan, inferred from garbage dump remains. *Acta Herpetologica*. **8**, 19–34 (2013).
850. Y. Nakamura, A. Takahashi, H. Ota, A new, recently extinct subspecies of the Kuroiwa's leopard gecko, *Goniurosaurus kuroiwae* (Squamata: Eublepharidae), from Yoronjima Island of the Ryukyu Archipelago, Japan. *Acta Herpetologica*. **9**, 61–73 (2014).
851. A. H. Whitaker, R. A. Sadler, "*Dierogekko inexpectatus*. The IUCN Red List of Threatened Species. Version 2014.3" (IUCN, 2013).
852. P. Skipwith, T. Jackman, A. H. Whitaker, A. M. Bauer, R. A. Sadler, New data on Dierogekko (Squamata: Gekkota: Diplodactylidae), with the description of a new species from Île Baaba, Province Nord, New Caledonia (2014).
853. A. M. Bauer, T. Jackman, R. A. Sadler, A. H. Whitaker, A revision of the Bavayia validiclavis group (Squamata: Gekkota: Diplodactylidae), a clade of New Caledonian geckos exhibiting microendemism. *PROCEEDINGS-CALIFORNIA ACADEMY OF SCIENCES*. **57**, 503 (2006).
854. A. H. Whitaker, R. A. Sadler, "*Dierogekko kaalaensis*. The IUCN Red List of Threatened Species. Version 2014.3" (IUCN, 2013).
855. A. H. Whitaker, R. A. Sadler, "*Dierogekko koniambo*. The IUCN Red List of Threatened Species. Version 2014.3" (IUCN, 2013).
856. A. H. Whitaker, R. A. Sadler, "*Dierogekko nehoueensis*. The IUCN Red List of Threatened Species. Version 2014.3" (IUCN, 2013).
857. A. H. Whitaker, R. A. Sadler, "*Dierogekko poumensis*. The IUCN Red List of Threatened Species. Version 2014.3" (IUCN, 2013).
858. A. H. Whitaker, R. A. Sadler, "*Dierogekko thomaswhitei*. The IUCN Red List of Threatened Species. Version 2014.3" (IUCN, 2013).
859. A. H. Whitaker, R. A. Sadler, "*Dierogekko validiclavis*. The IUCN Red List of Threatened Species. Version 2014.3" (IUCN, 2013).
860. B. D. Bell, in *Turning the tide: the eradication of invasive Species*, C. R. Veitch, M. N. Clout, Eds. (IUCN SSC Invasive Species Specialist Group. IUCN, Gland, 2002), pp. 40–45.
861. A. H. Whitaker, R. A. Sadler, "*Oedodera marmorata*. The IUCN Red List of Threatened Species. Version 2014.3" (IUCN, 2013).
862. A. M. Bauer, T. Jackman, R. A. Sadler, A. H. A. H. Whitaker, A new genus and species of diplodactylid gecko (Reptilia: Squamata: Diplodactylidae) from northwestern New Caledonia. *Pacific Science*. **60**, 125–136 (2006).
863. A. Allison, A. Hamilton, O. Tallowin, "*Perochirus ateles*. The IUCN Red List of Threatened Species. Version 2014.3" (IUCN, 2013).

864. K. Nelson, H. Snell, M. Wikelski, “*Amblyrhynchus cristatus*. The IUCN Red List of Threatened Species. Version 2015.2” (IUCN, 2004).
865. K. Nelson, H. Snell, M. Wikelski, “*Amblyrhynchus cristatus ssp. albemarlensis*. The IUCN Red List of Threatened Species. Version 2015.2.” (IUCN, 2004).
866. H. Kruuk, H. Snell, Prey selection by feral dogs from a population of marine iguanas (*Amblyrhynchus cristatus*). *Journal of Applied Ecology*. **18**, 197–204 (1981).
867. R. Fisher, T. Grant, P. Harlow, “*Brachylophus bulabula*. The IUCN Red List of Threatened Species. Version 2014.3” (IUCN, 2015).
868. J. Gibbons, Iguanas of the South Pacific. *Oryx*. **18**, 82–91 (1984).
869. R. Fisher, T. Grant, P. Harlow, “*Brachylophus fasciatus*. The IUCN Red List of Threatened Species. Version 2014.3” (IUCN, 2015).
870. P. Harlow, R. Fisher, T. Grant, “*Brachylophus vitiensis*. The IUCN Red List of Threatened Species. Version 2014.3” (IUCN, 2015).
871. P. S. Harlow *et al.*, The decline of the endemic Fijian crested iguana *Brachylophus vitiensis* in the Yasawa and Mamanuca archipelagos, western Fiji. *Oryx*. **41**, 44–50 (2007).
872. G. Gentile, “*Conolophus marthae*. The IUCN Red List of Threatened Species. Version 2015.2” (IUCN, 2012).
873. S. Pasachnik, A. Martinez, M. S. Perez, “*Ctenosaura bakeri*. The IUCN Red List of Threatened Species. Version 2015.2” (IUCN, 2013).
874. S. Pasachnik, C. E. Montgomery, E. Henningheim, “*Ctenosaura melanosterna*. The IUCN Red List of Threatened Species. Version 2015.2” (IUCN, 2012).
875. V. H. Reynoso, S. Pasachnik, “*Ctenosaura nolascensis*. The IUCN Red List of Threatened Species. Version 2015.2” (IUCN, 2012).
876. D. Ariano-Sanchez, S. Pasachnik, “*Ctenosaura palearis*. The IUCN Red List of Threatened Species. Version 2015.2” (IUCN, 2013).
877. J. B. Iverson, The impact of feral cats and dogs on populations of the West Indian rock iguana, *Cyclura carinata*. *Biological Conservation*. **14**, 63–73 (1978).
878. N. Mitchell *et al.*, in *Turning the tide: the eradication of invasive Species* (IUCN SSC Invasive Species Specialist Group. IUCN, Gland, 2002), pp. 206–212.
879. B. Wilson, R. van Ween, Jamaican Iguana Recovery Project, 2005 update. *Iguana Specialist Group Newsletter*. **8**, 4–6 (2005).
880. T. D. Grant, R. Gibson, B. S. Wilson, “*Cyclura collei*. The IUCN Red List of Threatened Species. Version 2015.2” (IUCN, 2010).
881. A. Alberts, *West Indian Iguanas: status survey and conservation action plan* (IUCN, Gland/Cambridge, 1999).
882. J. D. Woodley, Survival of the Jamaican iguana, *Cyclura collei*. *Journal of Herpetology*. **14**, 45–49 (1980).
883. D. S. Lewis, R. van Veen, B. S. Wilson, Conservation implications of small Indian mongoose (*Herpestes auro punctatus*) predation in a hotspot within a hotspot: the Hellshire Hills, Jamaica. *Biological Invasions*. **13**, 25–33 (2010).
884. J. Ottenwalder, “*Cyclura cornuta*. The IUCN Red List of Threatened Species. Version 2015.2” (IUCN, 1996).
885. C. R. Knapp, J. B. Iverson, S. Buckner, “*Cyclura cyclura*. The IUCN Red List of Threatened Species. Version 2015.2” (IUCN, 2004).
886. F. J. Burton, “*Cyclura lewisi*. The IUCN Red List of Threatened Species. Version 2015.2.” (IUCN, 2012).
887. R. Powell, Herpetology of Navassa Island, West Indies. *Caribbean Journal of Science*. **35**, 1–13 (1999).
888. N. Mitchell, “*Cyclura pinguis*. The IUCN Red List of Threatened Species. Version 2015.2.” (IUCN, 1996).
889. V. Pérez-Mellado, R. Marquez, I. Martinez-Solano, “*Algyroides marchi*. The IUCN Red List of Threatened Species. Version 2015.2” (IUCN, 2009).
890. J. Miras, I. Martinez-Solano, “*Gallotia auaritae*. The IUCN Red List of Threatened Species. Version 2015.2” (IUCN, 2009).
891. A. Valido, J. C. Rando, M. Nogales, A. Martin, “Fossil” lizard found alive in the Canary Islands. *Oryx*. **34**, 75–76 (2000).
892. J. Miras, V. Pérez-Mellado, I. Martinez-Solano, “*Gallotia bravoana*. The IUCN Red List of Threatened Species. Version 2015.2” (IUCN, 2009).

893. F. M. Medina, M. Nogales, A review on the impacts of feral cats (*Felis silvestris catus*) in the Canary Islands: implications for the conservation of its endangered fauna. *Biodiversity and Conservation*. **18**, 829–846 (2009).
894. J. Miras, V. Pérez-Mellado, I. Martínez-Solano, “*Gallotia intermedia*. The IUCN Red List of Threatened Species. Version 2015.2” (IUCN, 2009).
895. E. Hernández, M. Nogales, A. Martín, Discovery of a new lizard in the Canary Islands, with a multivariate analysis of *Gallotia* (Reptilia: Lacertidae). *Herpetologica*. **56**, 63–76 (2000).
896. J. Miras, V. Pérez-Mellado, I. Martínez-Solano, “*Gallotia simonyi*. The IUCN Red List of Threatened Species. Version 2015.2” (IUCN, 2009).
897. V. Pérez-Mellado, Population density in *Podarcis lilfordi* (Squamata, Lacertidae), a lizard species endemic to small islets in the Balearic Islands (Spain). *Amphibia-Reptilia*. **29**, 49–60 (2008).
898. V. Pérez-Mellado, I. Martínez-Solano, “*Podarcis lilfordi*. The IUCN Red List of Threatened Species. Version 2015.2” (IUCN, 2009).
899. V. P. Mellado, C. Corti, P. Lo Cascio, Tail autotomy and extinction in Mediterranean lizards. A preliminary study of continental and insular populations. *Journal of Zoology*. **243**, 533–541 (1997).
900. H. Ota, “*Takydromus toyamai*. The IUCN Red List of Threatened Species. Version 2015.2” (IUCN, 2010).
901. J. Gerlach, I. Ineich, “*Lycognathophis seychellensis*. The IUCN Red List of Threatened Species. Version 2015.2” (IUCN, 2006).
902. B. Tuniyev, N. Ananjeva, N. Orlov, S. Tuniyev, “*Natrix megalcephala*. The IUCN Red List of Threatened Species. Version 2015.2” (IUCN, 2009).
903. G. A. Hammerson, “*Thamnophis gigas*. The IUCN Red List of Threatened Species. Version 2015.2” (IUCN, 2007).
904. US Fish and Wildlife Service, Endangered and threatened wildlife and plants; determination of threatened status for the giant garter snake. *Federal Register*. **58**, 54053–54066 (1993).
905. G. Arnaud, A. Rodríguez, A. Ortega-Rubio, S. Alvarez-Cardenas, Predation by cats on the unique endemic lizard of Socorro Island (*Urosaurus auriculatus*), Revillagigedo, Mexico. *Ohio Journal of Science*. **93**, 101–104 (1993).
906. P. Ponce-Campos, A. Garcia Aguayo, “*Urosaurus clarionensis*. The IUCN Red List of Threatened Species. Version 2015.2” (IUCN, 2007).
907. T. Gamble, “*Phyllodactylus leei*. The IUCN Red List of Threatened Species. Version 2015.2” (IUCN, 2010).
908. O. Hawlitschek, B. Brückmann, J. Berger, K. Green, F. Glaw, Integrating field surveys and remote sensing data to study distribution, habitat use and conservation status of the herpetofauna of the Comoro Islands. *ZooKeys*. **144**, 21–79 (2011).
909. I. Ineich, “*Afroablepharus africana*. The IUCN Red List of Threatened Species. Version 2015.2” (IUCN, 2010).
910. I. Ineich, “*Afroablepharus annobonensis*. The IUCN Red List of Threatened Species. Version 2015.2” (IUCN, 2010).
911. A. H. Whitaker, R. A. Sadler, “*Caledoniscincus auratus*. The IUCN Red List of Threatened Species. Version 2014.3” (IUCN, 2013).
912. A. H. Whitaker, R. A. Sadler, “*Caledoniscincus orestes*. The IUCN Red List of Threatened Species. Version 2014.3” (IUCN, 2013).
913. A. H. Whitaker, R. A. Sadler, “*Caledoniscincus renevieri*. The IUCN Red List of Threatened Species. Version 2014.3” (IUCN, 2013).
914. A. H. Whitaker, R. A. Sadler, “*Caledoniscincus terma*. The IUCN Red List of Threatened Species. Version 2014.3” (IUCN, 2013).
915. S. B. Hedges, C. E. Conn, A new skink fauna from Caribbean islands (Squamata, Mabuyidae, Mabuyinae). *Zootaxa*. **3288**, 1–244 (2012).
916. A. H. Whitaker, R. A. Sadler, “*Celatiscincus similis*. The IUCN Red List of Threatened Species. Version 2014.3” (IUCN, 2013).
917. J. Miras, V. Pérez-Mellado, I. Martínez-Solano, “*Chalcides simonyi*. The IUCN Red List of Threatened Species. Version 2015.2” (IUCN, 2009).
918. F. Andreone, F. M. Guarino, Giant and long-lived? Age structure in *Macroscincus coctei*, an extinct skink from Cape Verde. *Amphibia-Reptilia*. **24**, 459–470 (2003).
919. F. Andreone, E. Gavetti, Some remarkable specimens of the giant cape verde skink, *Macroscincus coctei* (Duméril & Bibron, 1839), with notes about its distribution and causes of its possible extinction. *Italian Journal of Zoology*. **65**, 413–421 (1998).



920. A. Allison, A. Hamilton, C. M. Austin, R. Fisher, "*Emoia adspersa*. The IUCN Red List of Threatened Species. Version 2014.3" (IUCN, 2013).
921. A. Allison, C. C. Austin, R. Fisher, A. Hamilton, O. Tallowin, "*Emoia boettgeri*. The IUCN Red List of Threatened Species. Version 2014.3" (IUCN, 2013).
922. A. Allison, C. C. Austin, "*Emoia lawesi*. The IUCN Red List of Threatened Species. Version 2014.3" (IUCN, 2010).
923. A. H. Whitaker, R. A. Sadler, "*Emoia loyaltiensis*. The IUCN Red List of Threatened Species. Version 2014.3" (IUCN, 2013).
924. A. Allison, A. Hamilton, O. Tallowin, "*Emoia parkeri*. The IUCN Red List of Threatened Species. Version 2014.3" (IUCN, 2013).
925. C. Morrison, Distribution and diversity of Fiji's terrestrial herpetofauna: implications for forest conservation. *Pacific Science*. **59**, 481–489 (2005).
926. R. Fisher, A. Hamilton, A. Allison, O. Tallowin, "*Emoia samoensis*. The IUCN Red List of Threatened Species. Version 2014.3" (IUCN, 2013).
927. A. Allison, R. Fisher, A. Hamilton, O. Tallowin, "*Emoia slevini*. The IUCN Red List of Threatened Species. Version 2014.3" (IUCN, 2013).
928. C. C. Kessler, Eradication of feral goats and pigs and consequences for other biota on Sarigan Island, Commonwealth of the Northern Mariana Islands. *Turning the tide: the eradication of invasive species*, 132–141 (2002).
929. A. Allison, A. Hamilton, O. Tallowin, "*Emoia trossula*. The IUCN Red List of Threatened Species" (IUCN, 2013).
930. A. H. Whitaker, R. A. Sadler, A. M. Bauer, "*Geoscincus haraldmeieri*. The IUCN Red List of Threatened Species. Version 2014.3" (IUCN, 2010).
931. J. Gerlach, I. Ineich, "*Janetaescincus braueri*. The IUCN Red List of Threatened Species. Version 2015.2" (IUCN, 2006).
932. J. Gerlach, Population and conservation status of the reptiles of the Seychelles islands. *Phelsuma*. **16**, 30–48 (2008).
933. J. Gerlach, I. Ineich, "*Janetaescincus vesevfitzgeraldi*. The IUCN Red List of Threatened Species" (IUCN, 2006).
934. A. H. Whitaker, R. A. Sadler, "*Kanakysaurus viviparus*. The IUCN Red List of Threatened Species. Version 2014.3" (IUCN, 2013).
935. A. H. Whitaker, R. A. Sadler, "*Kanakysaurus zebratus*. The IUCN Red List of Threatened Species. Version 2014.3" (IUCN, 2013).
936. A. H. Whitaker, R. A. Sadler, "*Lacertoides pardalis*. The IUCN Red List of Threatened Species. Version 2014.3" (IUCN, 2013).
937. R. Fisher, A. Hamilton, A. Allison, O. Tallowin, "*Leiolopisma alazon*. The IUCN Red List of Threatened Species. Version 2014.3" (IUCN, 2013).
938. A. H. Whitaker, R. A. Sadler, "*Lioscincus maruia*. The IUCN Red List of Threatened Species. Version 2014.3" (IUCN).
939. A. H. Whitaker, R. A. Sadler, "*Lioscincus steindachneri*. The IUCN Red List of Threatened Species. Version 2014.3" (IUCN, 2013).
940. A. H. Whitaker, R. A. Sadler, "*Lioscincus vivae*. The IUCN Red List of Threatened Species. Version 2014.3" (IUCN, 2013).
941. A. H. Whitaker, R. A. Sadler, "*Marmorosphax boulinda*. The IUCN Red List of Threatened Species. Version 2014.3" (IUCN, 2013).
942. A. H. Whitaker, R. A. Sadler, "*Marmorosphax kaala*. The IUCN Red List of Threatened Species. Version 2014.3" (IUCN, 2013).
943. A. H. Whitaker, R. A. Sadler, "*Marmorosphax montana*. The IUCN Red List of Threatened Species. Version 2014.3" (IUCN, 2010).
944. A. H. Whitaker, R. A. Sadler, "*Marmorosphax taom*. The IUCN Red List of Threatened Species. Version 2014.3" (IUCN, 2013).
945. A. H. Whitaker, R. A. Sadler, "*Nannoscincus exos*. The IUCN Red List of Threatened Species. Version 2014.3" (IUCN, 2013).
946. A. H. Whitaker, R. A. Sadler, "*Nannoscincus garrulus*. The IUCN Red List of Threatened Species. Version 2014.3" (IUCN, 2013).
947. A. H. Whitaker, R. A. Sadler, "*Nannoscincus gracilis*. The IUCN Red List of Threatened Species. Version 2014.3" (IUCN, 2010).

948. A. H. Whitaker, R. A. Sadler, “*Nannoscincus greeri*. The IUCN Red List of Threatened Species. Version 2014.3” (IUCN, 2013).
949. R. A. Sadler, A. H. Whitaker, A. M. Bauer, “*Nannoscincus hanchisteus*. The IUCN Red List of Threatened Species. Version 2014.3” (IUCN, 2010).
950. A. H. Whitaker, R. A. Sadler, “*Nannoscincus mariei*. The IUCN Red List of Threatened Species. Version 2014.3” (IUCN, 2013).
951. D. R. Towns, I. A. E. Atkinson, C. H. Daugherty, Have the harmful effects of introduced rats on islands been exaggerated? *Biological Invasions*. **8**, 863–891 (2006).
952. D. R. Towns, C. H. Daugherty, Patterns of range contractions and extinctions in the New Zealand herpetofauna following human colonisation. *New Zealand Journal of Zoology*. **21**, 325–339 (1994).
953. D. G. Newman, Effects of a mouse, *Mus musculus*, eradication programme and habitat change on lizard populations of Mana Island, New Zealand, with special reference to McGregor's skink, *Cyclodina macgregori*. *New Zealand Journal of Zoology*. **21**, 443–456 (1994).
954. M. D. Tocher, Survival of grand and Otago skinks following predator control. *Journal of Wildlife Management*. **70**, 31–42 (2006).
955. G. Norbury et al., Impacts of invasive house mice on post-release survival of translocated lizards. *New Zealand Journal of Ecology*. **38**, 322–327 (2014).
956. J. T. Reardon et al., Predator control allows critically endangered lizards to recover on mainland New Zealand. *New Zealand Journal of Ecology*. **36**, 141–150 (2012).
957. R. A. Sadler, A. H. Whitaker, A. M. Bauer, “*Phoboscincus bocourti*. The IUCN Red List of Threatened Species. Version 2014.3” (IUCN, 2010).
958. S. Caut, M. Holden, M. J. Jowers, R. Boistel, I. Ineich, Is Bocourt's terrific skink really so terrific? Trophic myth and reality. *PLOS ONE*. **8**, e78638 (2013).
959. R. A. Sadler, A. H. Whitaker, A. M. Bauer, “*Sigaloseps ruficauda*. The IUCN Red List of Threatened Species. Version 2014.3” (IUCN, 2010).
960. B. Hedges, “*Spondylurus monae*. The IUCN Red List of Threatened Species. Version 2015.2” (IUCN, 2013).
961. R. J. Platenberg, R. H. Boulon, Conservation status of reptiles and amphibians in the U.S. Virgin Islands. *Applied Herpetology*. **3**, 215–235 (2006).
962. A. Allison, A. Hamilton, O. Tallowin, “*Tachygyia microlepis*. The IUCN Red List of Threatened Species. Version 2014.3” (IUCN, 2012).
963. A. H. Whitaker, R. A. Sadler, “*Tropidoscincus aubrianus*. The IUCN Red List of Threatened Species. Version 2014.3” (IUCN, 2013).
964. E. J. Bentz, M. Rodriguez, R. R. John, R. W. Henderson, R. Powell, Population densities, activity, microhabitats, and thermal biology of a unique crevice- and litter-dwelling assemblage of reptiles on Union Island, St. Vincent and the Grenadines. *Herpetological Conservation and Biology*. **6**, 40–50 (2011).
965. R. Philibosian, R. Ruibal, Conservation of the lizard *Ameiva polops* in the Virgin Islands. *Herpetologica*. **27**, 450–454 (1971).
966. J. N. Baskin, E. E. Williams, The Lesser Antillean *Ameiva* (Sauria, Teiidae): Re-evaluation, zoogeography and the effects of predation. *Studies of the Fauna of Curacao and Other Caribbean Islands*. **89**, 144–178 (1966).
967. R. Philibosian, J. A. Yntema, Records and status of some reptiles and amphibians in the Virgin Islands. I. 1968–1975. *Herpetologica*. **32**, 81–85 (1976).
968. D. R. Frost, “*Aspidoscelis catalinensis*. The IUCN Red List of Threatened Species. Version 2015.2” (IUCN, 2007).
969. C. L. John, “Population and habitat of the St. Lucia whiptail lizard (*Cnemidophorus vanzoi*) on Praslin Island, St. Lucia (West Indies)” (Ministry of Agriculture, Forestry & Fisheries, St. Lucia, 1999).
970. R. E. Honegger, List of amphibians and reptiles either known or thought to have become extinct since 1600. *Biological Conservation*. **19**, 141–158 (1981).
971. J. Johnson, J. H. Townsend, “*Amerotyphlops stadelmani*. The IUCN Red List of Threatened Species. Version 2015.2” (IUCN, 2015).
972. World Conservation Monitoring Centre, “*Typhlops cariei*. The IUCN Red List of Threatened Species. Version 2015.2” (IUCN, 1996).

973. H. Avila Villegas, D. R. Frost, G. Arnaud, "Crotalus catalinensis. The IUCN Red List of Threatened Species. Version 2015.2" (IUCN, 2007).
974. F. Mendoza-Quijano, "Xenosaurus platyceps. The IUCN Red List of Threatened Species. Version 2015.2" (IUCN, 2007).
975. S. S. Hilmer, D. A. Algar, M. Johnston, Opportunistic observation of predation of loggerhead turtle hatchlings by feral cats on Dirk Hartog Island, Western Australia. *Journal of the Royal Society of Western Australia*. **93**, 141–146 (2010).
976. A. C. Broderick, B. J. Godley, Population and nesting ecology of the green turtle, *Chelonia mydas*, and the loggerhead turtle, *Caretta caretta*, in northern Cyprus. *Zoology in the Middle East*. **13**, 27–46 (1996).
977. C. Elmaz, M. Kalay, *Chelonia mydas* (L. 1758) ve *Caretta caretta* (L. 1758) "nyn Kazanlı Kumsal" ndaki Üreme Başarısý. *Ekoloji*. **58**, 28–32 (2006).
978. D. W. Nellis, V. Small, Mongoose predation on sea turtle eggs and nests. *Biotropica*. **15**, 159–160 (1983).
979. S. Caut, E. Angulo, F. Courchamp, Dietary shift of an invasive predator: rats, seabirds and sea turtles. *Journal of Applied Ecology*. **45**, 428–437 (2008).
980. W. Seabrook, Feral cats (*Felis catus*) as predators of hatchling green turtles (*Chelonia mydas*). *Journal of Zoology*. **219**, 83–88 (1989).
981. G. A. Seaman, J. E. Randall, The mongoose as a predator in the Virgin Islands. *Journal of Mammalogy*. **43**, 544–546 (1962).
982. B. E. Coblenz, B. A. Coblenz, Control of the Indian mongoose *Herpestes auro punctatus* on St John, US Virgin Islands. *Biological Conservation*. **33**, 281–288 (1985).
983. P. A. Leighton, J. A. Horrocks, B. H. Krueger, J. A. Beggs, D. L. Kramer, Predicting species interactions from edge responses: mongoose predation on hawksbill sea turtle nests in fragmented beach habitat. *Proceedings of the Royal Society B: Biological Sciences*. **275**, 2465–2472 (2008).
984. G. F. Ficetola, Impacts of human activities and predators on the nest success of the hawksbill turtle, *Eretmochelys imbricata*, in the Arabian gulf. *Chelonian Conservation and Biology*. **7**, 255–257 (2008).
985. J. A. Mortimer, M. Donnelly, "Hawksbill Turtle (*Eretmochelys imbricate*). Marine Turtle Specialist Group 2008 IUCN Red List status assessment" (IUCN, 2008).
986. C. Ordoñez, S. Troëng, A. Meylan, P. Meylan, A. Ruiz, Chiriqui Beach, Panama, the most important leatherback nesting beach in central America. *Chelonian Conservation and Biology*. **6**, 122–126 (2007).
987. R. F. Tapilatu, M. Tiwari, Leatherback turtle, *Dermochelys coriacea*, hatching success at Jamursba-Medi and Wermon Beaches in Papua, Indonesia. *Chelonian Conservation and Biology*. **6**, 154–158 (2007).
988. P. P. van Dijk, "Terrapene carolina. The IUCN Red List of Threatened Species. Version 2015.2" (IUCN, 2013).
989. World Conservation Monitoring Centre, "Cylindraspis inepta. The IUCN Red List of Threatened Species. Version 2015.2" (IUCN, 1996).
990. B. Groombridge, "Global biodiversity: status of the Earth's living resources" (World Conservation Monitoring Centre, London, 1992).
991. World Conservation Monitoring Centre, "Cylindraspis peltastes. The IUCN Red List of Threatened Species. Version 2015.2" (IUCN, 1996).
992. World Conservation Monitoring Centre, "Cylindraspis triserrata. The IUCN Red List of Threatened Species. Version 2015.2" (IUCN, 1996).
993. World Conservation Monitoring Centre, "Cylindraspis vosmaeri. The IUCN Red List of Threatened Species. Version 2015.2" (IUCN, 1996).
994. C. G. MacFarland, J. Villa, B. Toro, The Galápagos giant tortoises (*Geochelone elephantopus*) part II: conservation methods. *Biological Conservation*. **6**, 198–212 (1974).
995. C. G. MacFarland, J. Villa, B. Toro, The Galápagos giant tortoises (*Geochelone elephantopus*) part I: status of the surviving populations. *Biological Conservation*. **6**, 63–64 (1974).
996. D. W. Snow, The giant tortoises of the Galapagos Islands: their present status and future chances. *Oryx*. **7**, 277–290 (1964).
